# Supplementary material for: Antimicrobial Diterpene Alkaloids from an Agelas citrina Sponge Collected in the Yucatán Peninsula
Source: MDPI journal article supplement (doi:10.3390/md20050298), 2022-04-28
Supplement: s1 [file s1]

## SUPPLEMENTARY MATERIALS

### Antimicrobial Diterpene Alkaloids from an *Agelas citrina* Sponge Collected in Yucatán Peninsula

Dawrin Pech-Puch<sup>1,2</sup>, Abel M. Forero<sup>1</sup>, Juan Carlos Fuentes-Monteverde<sup>3</sup>, Cristina Lasarte-Monterrubio<sup>4</sup>, Marta Martinez-Guitian<sup>4</sup>, Carlos González-Salas<sup>2</sup>, Sergio Guillén-Hernández<sup>2</sup>, Harold Villegas-Hernández<sup>2</sup>, Alejandro Beceiro<sup>4</sup>, Christian Griesinger<sup>3</sup>, Jaime Rodríguez<sup>1,\*</sup> and Carlos Jiménez<sup>1,\*</sup>

<sup>1</sup> Departamento de Química, Facultade de Ciencias e Centro de Investigacións Científicas Avanzadas (CICA), Universidade de A Coruña, 15071 A Coruña, Spain

<sup>2</sup> Departamento de Biología Marina, Universidad Autónoma de Yucatán, Km. 15.5, carretera Mérida-Xmatkuil, A.P. 4-116 Itzimná, Mérida C.P. 97100, Yucatán, Mexico

<sup>3</sup> Department of NMR Based Structural Biology, Max Planck Institute (MPI) for Multidisciplinary Sciences, Am Fassberg 11, 37077 Göttingen, Germany

<sup>4</sup> Microbiology Department of the University Hospital A Coruña (CHUAC), Institute of Biomedical Research of A Coruña (INIBIC), Centro de Investigación Biomédica en Red (CIBER) Infec., 15006 A Coruña, Spain

\*Correspondence: jaime.rodriguez@udc.es; carlos.jimenez@udc.es

|                                                                                                                                                                                                                                                       |    |
|-------------------------------------------------------------------------------------------------------------------------------------------------------------------------------------------------------------------------------------------------------|----|
| <b>Scheme S1.</b> Extraction and fractionation scheme.....                                                                                                                                                                                            | 4  |
| <b>Figure S1.</b> $^1\text{H}$ NMR spectrum (500 MHz, $\text{DMSO}-d_6$ ) of 8-epiagelasine T ( <b>1</b> ).....                                                                                                                                       | 5  |
| <b>Figure S2.</b> $^{13}\text{C}$ NMR spectrum (125 MHz, $\text{DMSO}-d_6$ ) of 8-epiagelasine T ( <b>1</b> ). ....                                                                                                                                   | 5  |
| <b>Figure S3.</b> HSQC spectrum (500 MHz, $\text{DMSO}-d_6$ ) of 8-epiagelasine T ( <b>1</b> ). ....                                                                                                                                                  | 6  |
| <b>Figure S4.</b> $^1\text{H}$ - $^1\text{H}$ COSY spectrum (500 MHz, $\text{DMSO}-d_6$ ) of 8-epiagelasine T ( <b>1</b> ).....                                                                                                                       | 6  |
| <b>Figure S5.</b> HMBC spectrum (500 MHz, $\text{DMSO}-d_6$ ) of 8-epiagelasine T ( <b>1</b> ). ....                                                                                                                                                  | 7  |
| <b>Figure S6.</b> 1D-NOESY spectrum irradiating on $\text{CH}_3$ -17 ( $\delta_{\text{H}}$ 1.00) of 8-epiagelasine T ( <b>1</b> ) (500 MHz, $\text{DMSO}-d_6$ ). ....                                                                                 | 7  |
| <b>Figure S7.</b> 1D-NOESY spectrum irradiating on $\text{CH}_3$ -8 ( $\delta_{\text{H}}$ 0.84) and $\text{CH}_3$ -20 ( $\delta_{\text{H}}$ 0.74) of 8-epiagelasine T ( <b>1</b> ) (500 MHz, $\text{DMSO}-d_6$ ). ....                                | 8  |
| <b>Figure S8.</b> NOESY spectrum of 8-epiagelasine T ( <b>1</b> ) (500 MHz, $\text{DMSO}-d_6$ ). ....                                                                                                                                                 | 8  |
| <b>Figure S9.</b> (+)-HR-ESIMS of 8-epiagelasine T ( <b>1</b> ).....                                                                                                                                                                                  | 9  |
| <b>Table S1.</b> $^1\text{H}$ NMR (500 MHz) and $^{13}\text{C}$ NMR (125 MHz) and $^1\text{H}$ NMR (800 MHz) and $^{13}\text{C}$ NMR (200 MHz)* spectral data for 10-epiagelasine B ( <b>2</b> ) in $\text{CDCl}_3$ and $\text{C}_6\text{D}_6$ . .... | 10 |
| <b>Figure S10.</b> $^1\text{H}$ NMR spectrum (500 MHz, $\text{CDCl}_3$ ) of 10-epiagelasine B ( <b>2</b> ). ....                                                                                                                                      | 11 |
| <b>Figure S11.</b> $^{13}\text{C}$ NMR spectrum (125 MHz, $\text{CDCl}_3$ ) of 10-epiagelasine B ( <b>2</b> ). ....                                                                                                                                   | 11 |
| <b>Figure S12.</b> HSQC spectrum (500 MHz, $\text{CDCl}_3$ ) of 10-epiagelasine B ( <b>2</b> ). ....                                                                                                                                                  | 12 |
| <b>Figure S13.</b> $^1\text{H}$ - $^1\text{H}$ COSY spectrum (500 MHz, $\text{CDCl}_3$ ) of 10-epiagelasine B ( <b>2</b> ). ....                                                                                                                      | 12 |
| <b>Figure S14.</b> HMBC spectrum (500 MHz, $\text{CDCl}_3$ ) of 10-epiagelasine B ( <b>2</b> ). ....                                                                                                                                                  | 13 |
| <b>Figure S15.</b> NOESY spectrum (500 MHz, $\text{CDCl}_3$ ) of 10-epiagelasine B ( <b>2</b> ). ....                                                                                                                                                 | 13 |
| <b>Figure S16.</b> (+)-HR-ESIMS of 10-epiagelasine B ( <b>2</b> ). ....                                                                                                                                                                               | 14 |
| <b>Figure S17.</b> $^1\text{H}$ NMR spectrum (500 MHz, $\text{C}_6\text{D}_6$ ) of 10-epiagelasine B ( <b>2</b> ). ....                                                                                                                               | 14 |
| <b>Figure S18.</b> $^{13}\text{C}$ NMR spectrum (125 MHz, $\text{C}_6\text{D}_6$ ) of 10-epiagelasine B ( <b>2</b> ). ....                                                                                                                            | 15 |
| <b>Figure S19.</b> HSQC NMR spectrum (500 MHz, $\text{C}_6\text{D}_6$ ) of 10-epiagelasine B ( <b>2</b> ). ....                                                                                                                                       | 15 |
| <b>Figure S20.</b> $^1\text{H}$ - $^1\text{H}$ COSY NMR spectrum (500 MHz, $\text{C}_6\text{D}_6$ ) of 10-epiagelasine B ( <b>2</b> ). ....                                                                                                           | 16 |
| <b>Figure S21.</b> HMBC NMR spectrum (500 MHz, $\text{C}_6\text{D}_6$ ) of 10-epiagelasine B ( <b>2</b> ). ....                                                                                                                                       | 16 |
| <b>Figure S22.</b> NOESY NMR spectrum (500 MHz, $\text{C}_6\text{D}_6$ ) of 10-epiagelasine B ( <b>2</b> ). ....                                                                                                                                      | 17 |
| <b>Figure S23.</b> $^1\text{H}$ NMR spectrum (800 MHz, $\text{CDCl}_3$ , after 24 h) of 10-epiagelasine B ( <b>2</b> ). ....                                                                                                                          | 17 |
| <b>Figure S24.</b> $^{13}\text{C}$ NMR spectrum (200 MHz, $\text{CDCl}_3$ , after 24 h) of 10-epiagelasine B ( <b>2</b> ). ....                                                                                                                       | 18 |
| <b>Figure S25.</b> HSQC spectrum (800 MHz, $\text{CDCl}_3$ , after 24 h) of 10-epiagelasine B ( <b>2</b> ). NUS parameters: 20%/384/38. ....                                                                                                          | 18 |
| <b>Figure S26.</b> $^1\text{H}$ - $^1\text{H}$ COSY spectrum (800 MHz, $\text{CDCl}_3$ , after 24 h) of 10-epiagelasine B ( <b>2</b> ). NUS parameters: 50%/384/192. ....                                                                             | 19 |
| <b>Figure S27.</b> HMBC spectrum (800 MHz, $\text{CDCl}_3$ , after 24 h) of 10-epiagelasine B ( <b>2</b> ). NUS parameters: 25%/512/64. ....                                                                                                          | 19 |
| <b>Figure S28.</b> 1D-NOESY spectrum irradiating on $\text{CH}_3$ -17 ( $\delta_{\text{H}}$ 1.10) of 10-epiagelasine B ( <b>2</b> ) (800 MHz, $\text{CDCl}_3$ , after 24 h). ....                                                                     | 20 |
| <b>Figure S29.</b> 1D-NOESY spectrum irradiating on $\text{CH}_3$ -19 ( $\delta_{\text{H}}$ 1.15) of 10-epiagelasine B ( <b>2</b> ) (800 MHz, $\text{CDCl}_3$ , after 24 h). ....                                                                     | 20 |

|                                                                                                                                                                                                                                                                                                     |    |
|-----------------------------------------------------------------------------------------------------------------------------------------------------------------------------------------------------------------------------------------------------------------------------------------------------|----|
| <b>Figure S30.</b> 1D-NOESY spectrum irradiating on CH <sub>3</sub> -20 ( $\delta_{\text{H}}$ 0.87) of 10-epiagelasine B ( <b>2</b> ) (800 MHz, CDCl <sub>3</sub> , after 24 h).....                                                                                                                | 21 |
| <b>Figure S31.</b> 2D IPAP-HSQMBC spectrum (optimized to 6 Hz) after selective inversion of H-10 proton of 10-epi-agelasine B (A). Slice from C-19 to H-10 (B). Measurement of $^{2,3}J_{\text{CH}}$ values were performed by analysis of IPAP multiplet patterns. NUS parameters: 12%/512/30. .... | 22 |
| <b>Figure S32.</b> 2D IPAP-HSQMBC spectrum (optimized to 6 Hz) after selective inversion of H-5 proton of <b>7</b> . Slice from C-7 to H-5 (B). Measurement of $^{2,3}J_{\text{CH}}$ values were performed by analysis of IPAP multiplet patterns. NUS parameters: 12%/512/30.....                  | 22 |
| <b>Figure S33.</b> 2D IPAP-HSQMBC spectrum (optimized to 6 Hz) after selective inversion of H-5 proton of <b>8</b> . Slice from C-7 to H-5 (B). Measurement of $^{2,3}J_{\text{CH}}$ values were performed by analysis of IPAP multiplet patterns. NUS parameters: 12%/512/30.....                  | 23 |
| <b>Figure S34.</b> <sup>1</sup> H NMR spectrum (500 MHz, CDCl <sub>3</sub> ) of 12-hydroxyagelasidine C ( <b>3</b> ). ....                                                                                                                                                                          | 24 |
| <b>Figure S35.</b> <sup>13</sup> C NMR spectrum (125 MHz, CDCl <sub>3</sub> ) of 12-hydroxyagelasidine C ( <b>3</b> ).....                                                                                                                                                                          | 24 |
| <b>Figure S36.</b> HSQC spectrum (500 MHz, CDCl <sub>3</sub> ) of 12-hydroxyagelasidine C ( <b>3</b> ).....                                                                                                                                                                                         | 25 |
| <b>Figure S37.</b> <sup>1</sup> H- <sup>1</sup> H COSY spectrum (500 MHz, CDCl <sub>3</sub> ) of 12-hydroxyagelasidine C ( <b>3</b> ). ....                                                                                                                                                         | 25 |
| <b>Figure S38.</b> HMBC spectrum (500 MHz, CDCl <sub>3</sub> ) of 12-hydroxyagelasidine C ( <b>3</b> ). ....                                                                                                                                                                                        | 26 |
| <b>Figure S39.</b> NOESY spectrum (500 MHz, CDCl <sub>3</sub> ) of 12-hydroxyagelasidine C ( <b>3</b> ). ....                                                                                                                                                                                       | 26 |
| <b>Figure S40.</b> (+)-HR-ESIMS of 12-hydroxyagelasidine C ( <b>3</b> ).....                                                                                                                                                                                                                        | 27 |

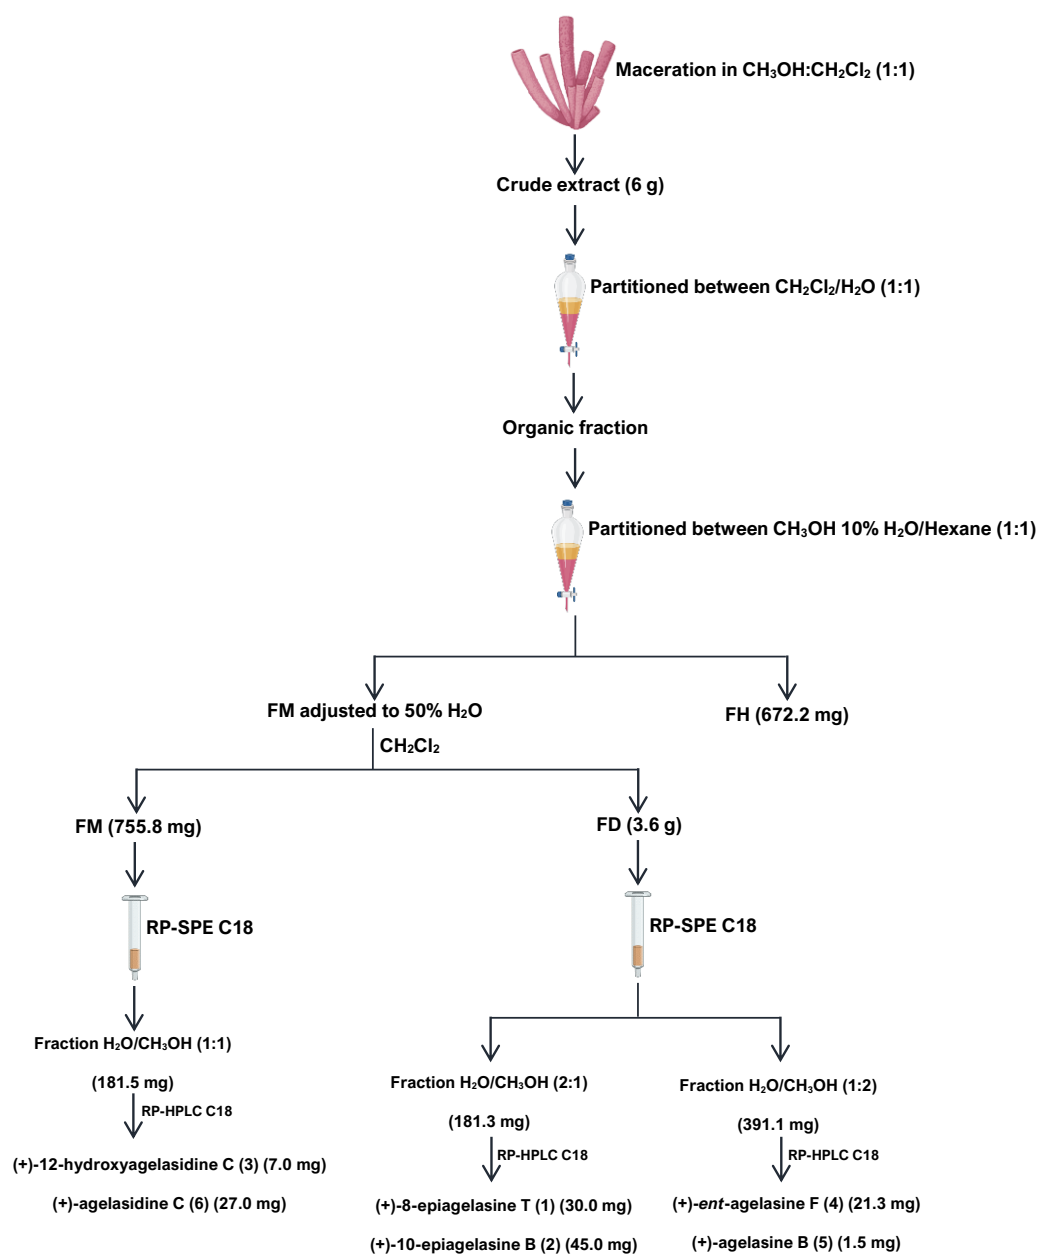

**Scheme S1.** Extraction and fractionation scheme.

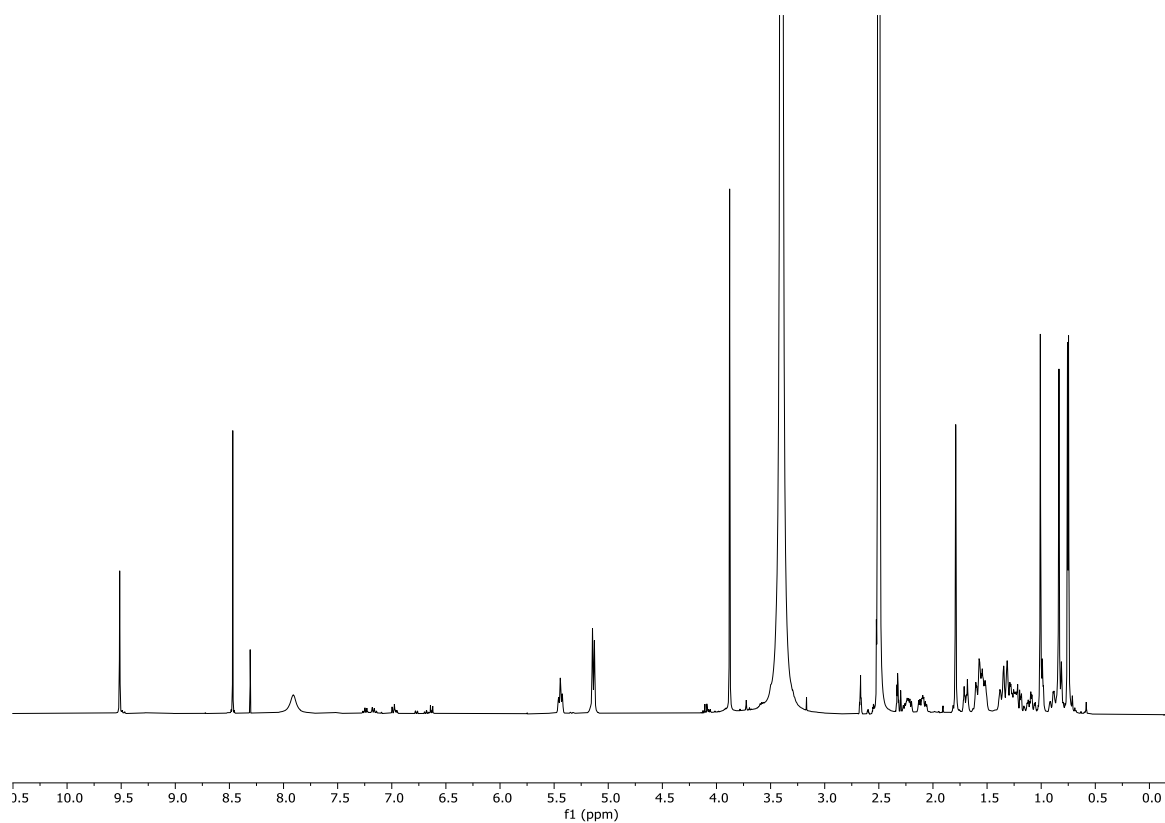

**Figure S1.**  $^1\text{H}$  NMR spectrum (500 MHz,  $\text{DMSO}-d_6$ ) of 8-epiagelasine T (**1**).

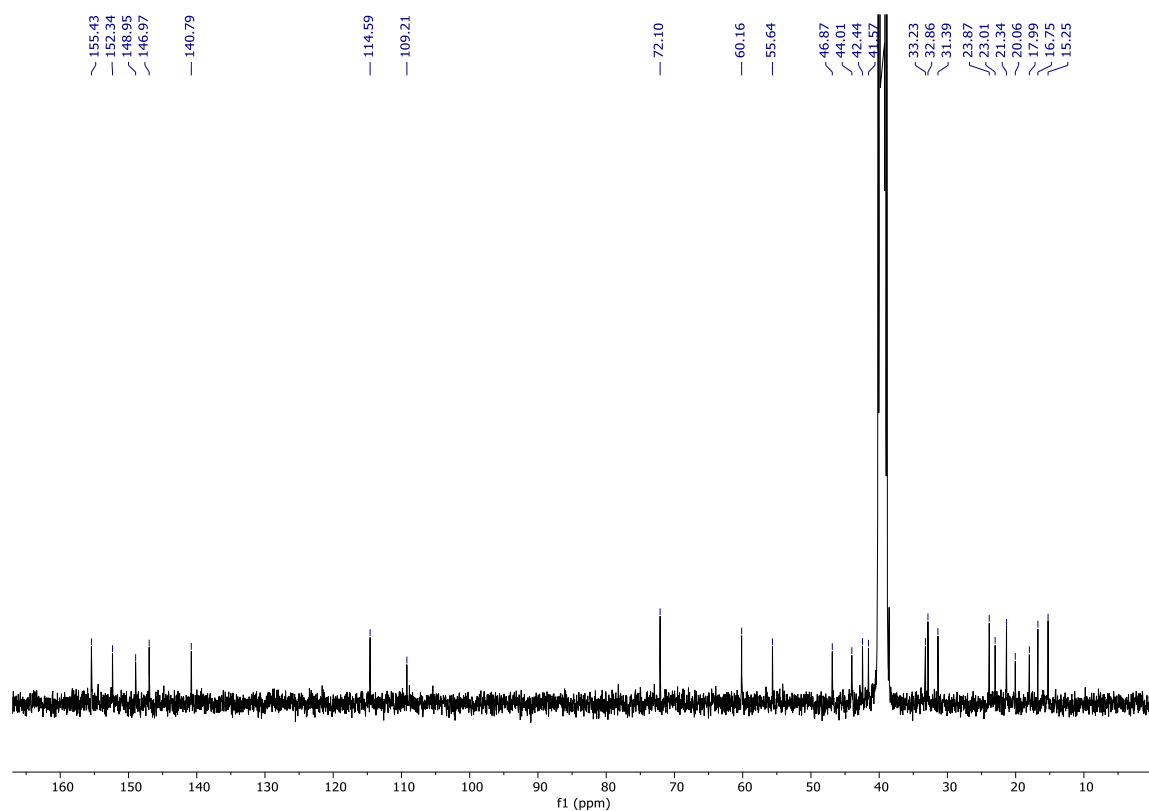

**Figure S2.**  $^{13}\text{C}$  NMR spectrum (125 MHz,  $\text{DMSO}-d_6$ ) of 8-epiagelasine T (**1**).

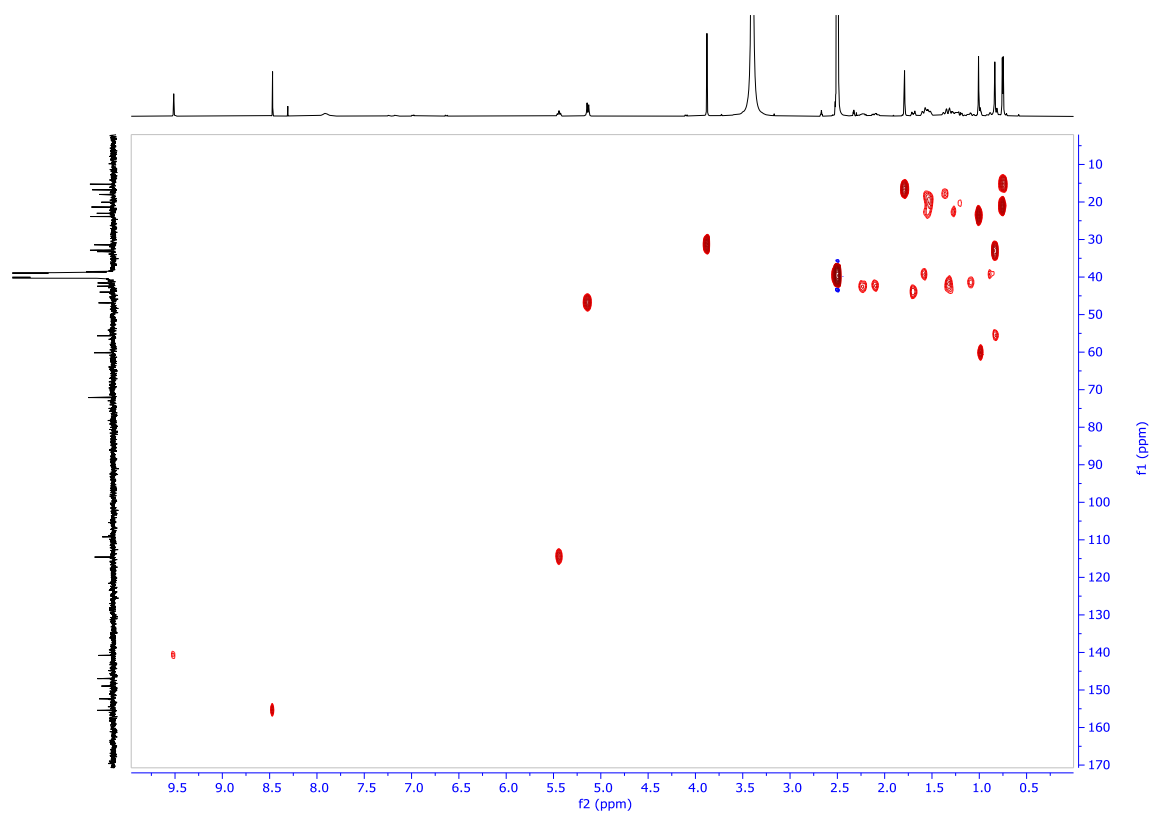

**Figure S3.** HSQC spectrum (500 MHz,  $\text{DMSO}-d_6$ ) of 8-epiagelasine T (**1**).

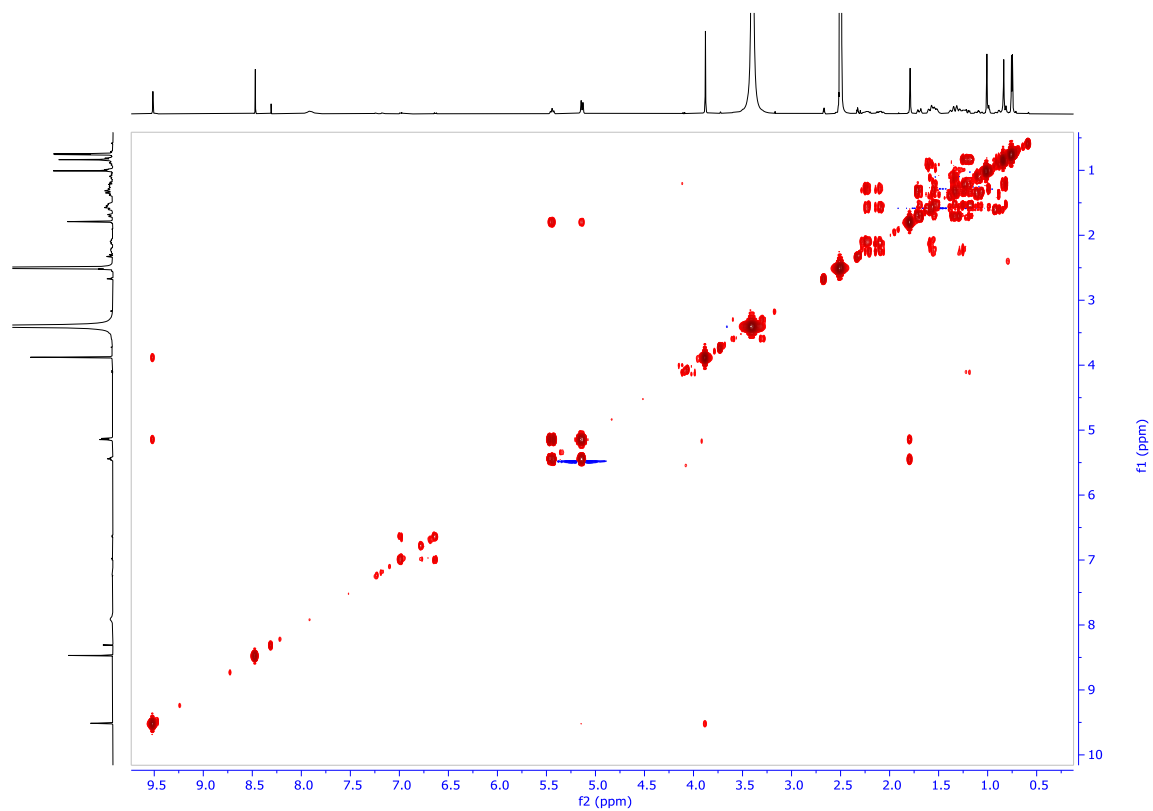

**Figure S4.**  $^1\text{H}$ - $^1\text{H}$  COSY spectrum (500 MHz,  $\text{DMSO}-d_6$ ) of 8-epiagelasine T (**1**).

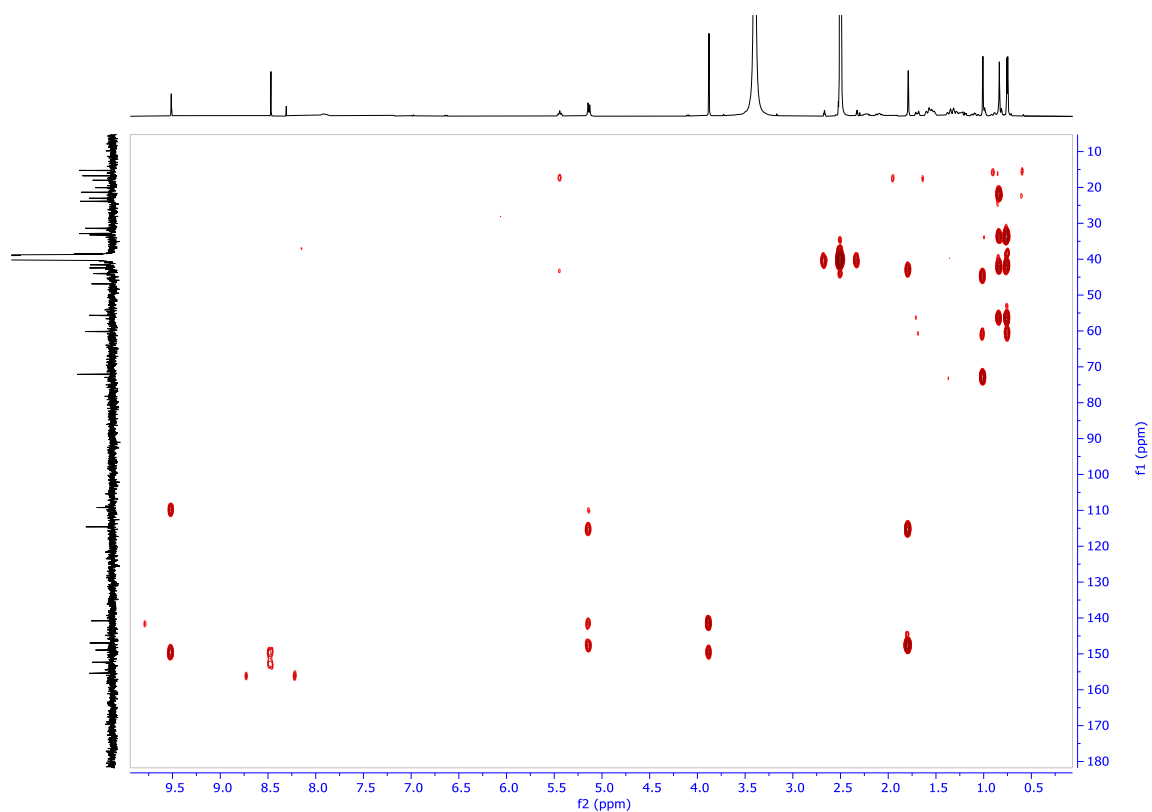

**Figure S5.** HMBC spectrum (500 MHz, DMSO- $d_6$ ) of 8-epiagelasine T (**1**).

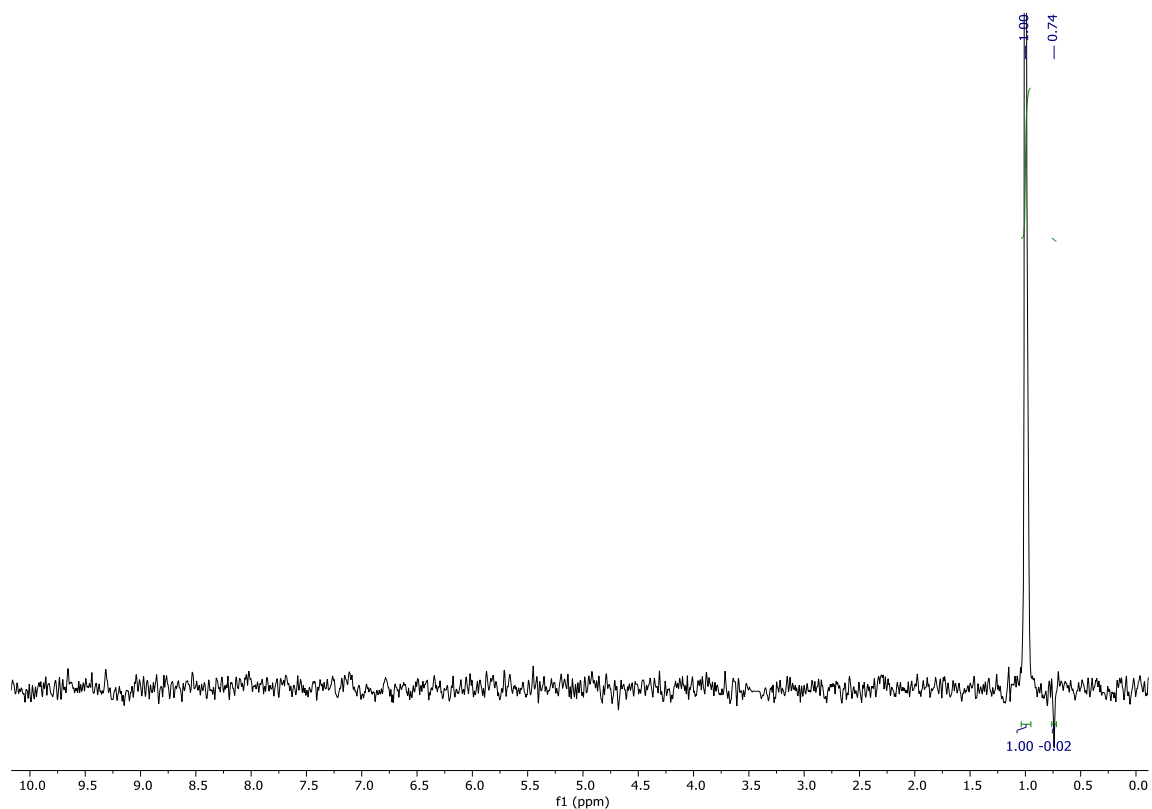

**Figure S6.** 1D-NOESY spectrum irradiating on CH<sub>3</sub>-17 ( $\delta_H$  1.00) of 8-epiagelasine T (**1**) (500 MHz, DMSO- $d_6$ ).

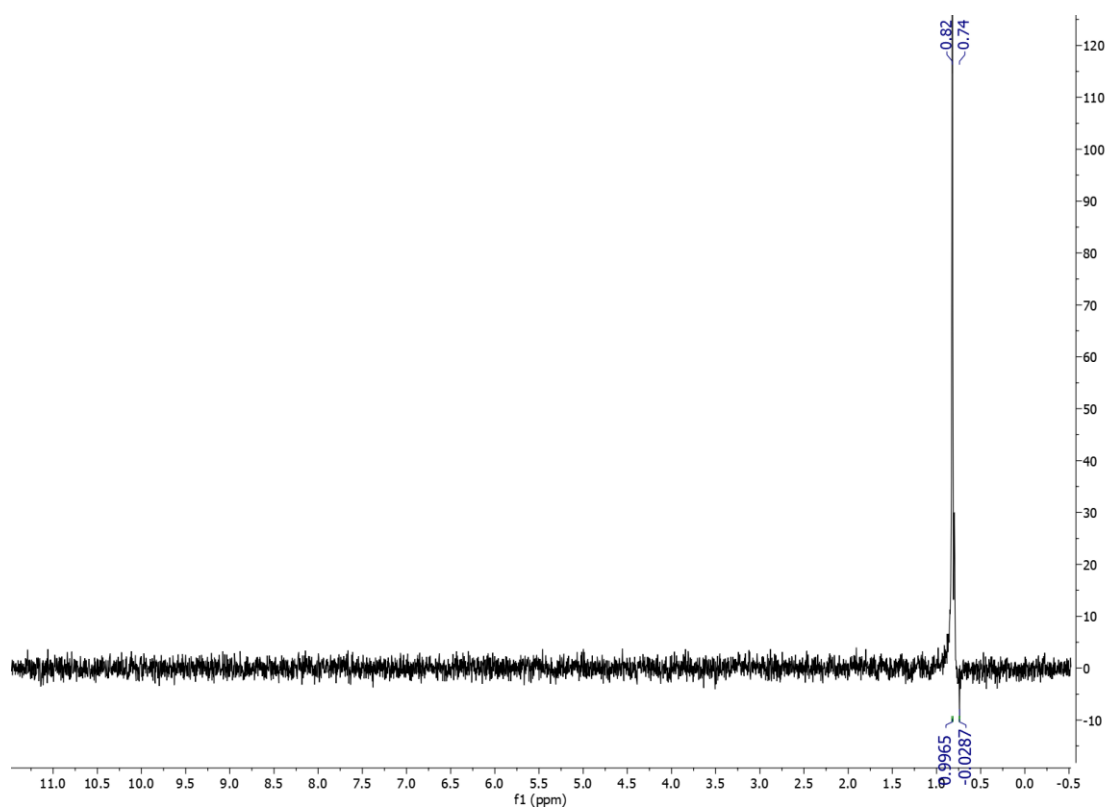

**Figure S7.** 1D-NOESY spectrum irradiating on CH<sub>3</sub>-8 ( $\delta_{\text{H}}$  0.84) and CH<sub>3</sub>-20 ( $\delta_{\text{H}}$  0.74) of 8-epiagelasine T (**1**) (500 MHz, DMSO-*d*<sub>6</sub>).

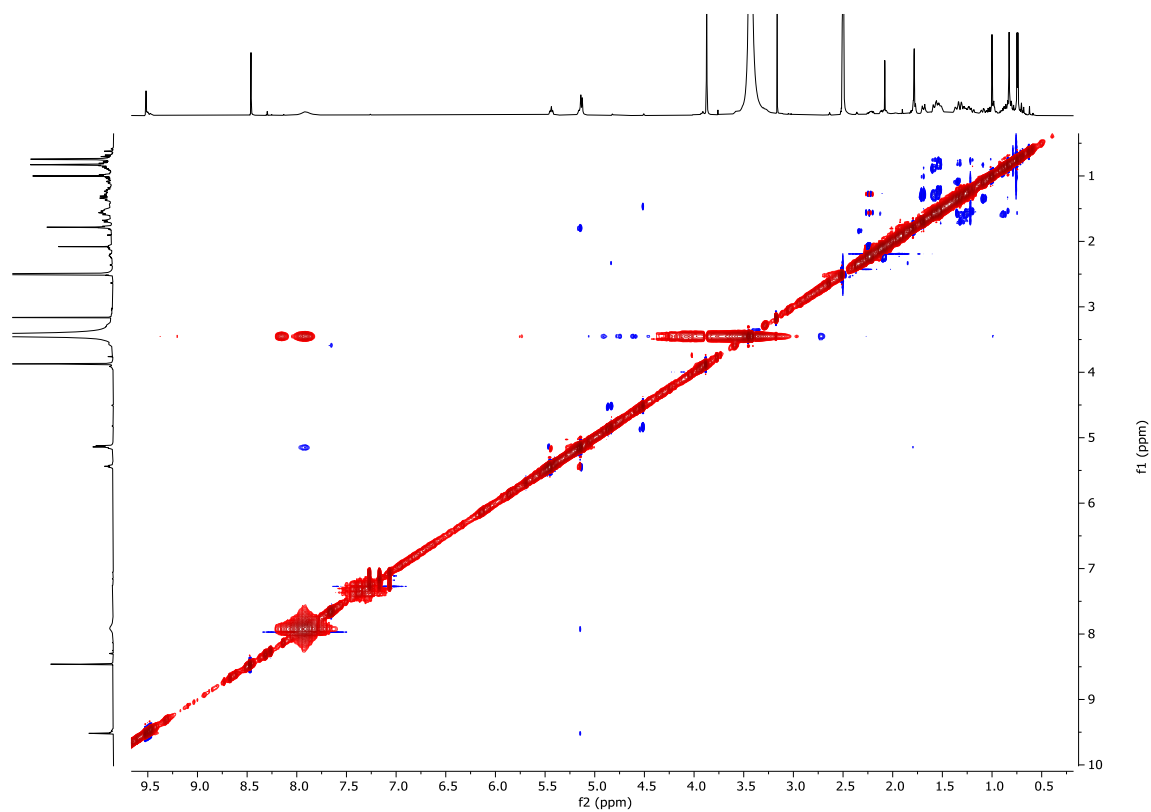

**Figure S8.** NOESY spectrum of 8-epiagelasine T (**1**) (500 MHz, DMSO-*d*<sub>6</sub>).



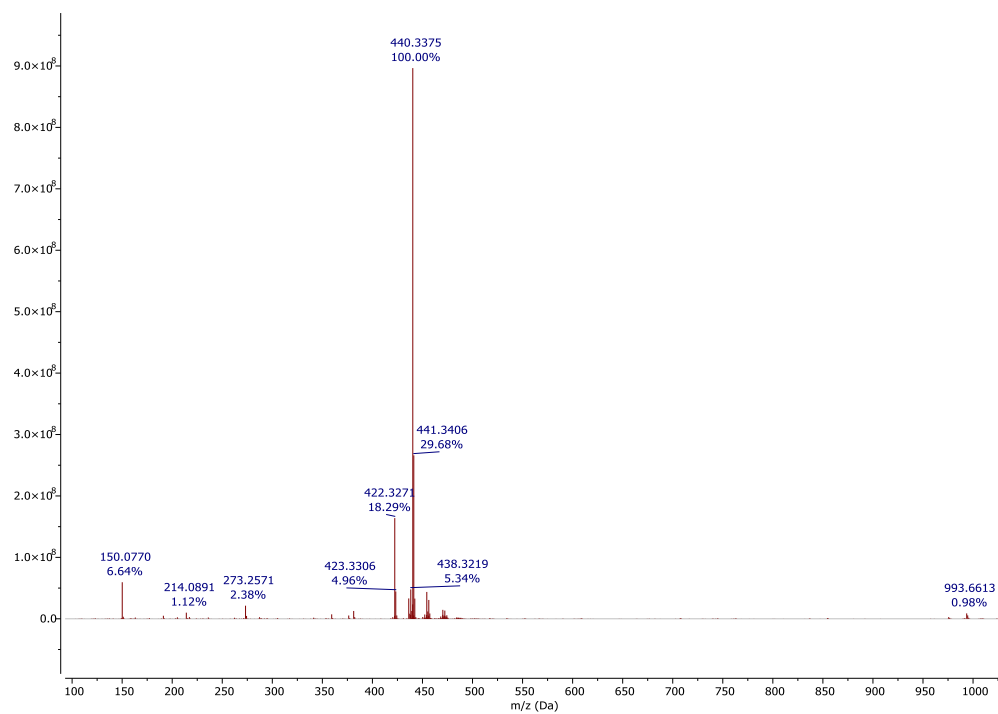

**Figure S9. (+)-HR-ESIMS of 8-epiagelasine T (1).**

**Table S1.** <sup>1</sup>H NMR (500 MHz) and <sup>13</sup>C NMR (125 MHz) and <sup>1</sup>H NMR (800 MHz) and <sup>13</sup>C NMR (200 MHz)\* spectral data for 10-epiagelasine B (**2**) in CDCl<sub>3</sub> and C<sub>6</sub>D<sub>6</sub>.

| Position | 10-epiagelasine B <sup>a</sup>        |                            | 10-epiagelasine B <sup>b</sup>        |                            | 10-epiagelasine B <sup>c</sup>        |                            |
|----------|---------------------------------------|----------------------------|---------------------------------------|----------------------------|---------------------------------------|----------------------------|
|          | $\delta_{\text{H}}$ , mult, (J in Hz) | $\delta_{\text{C}}$ , Type | $\delta_{\text{H}}$ , mult, (J in Hz) | $\delta_{\text{C}}$ , Type | $\delta_{\text{H}}$ , mult, (J in Hz) | $\delta_{\text{C}}$ , Type |
| 1        | 1.64 m                                | 19.7, CH <sub>2</sub>      | 1.60, m                               | 20.1, CH <sub>2</sub>      | 1.65 m                                | 31.0, CH <sub>2</sub>      |
|          | 1.33, m                               |                            | 1.31, m                               |                            | 1.24, m                               |                            |
| 2        | 1.98, m                               | 22.9, CH <sub>2</sub>      | 1.98, m                               | 23.4, CH <sub>2</sub>      | 1.93, m                               | 32.5, CH <sub>2</sub>      |
|          | 1.91, m                               |                            | 1.21, m                               |                            | 1.78, m                               |                            |
| 3        | 5.30, brs                             | 120.7, CH                  | 5.37, brs                             | 121.1, CH                  | 5.20, brs                             | 126.0, CH                  |
| 4        |                                       | 136.2, C                   |                                       | 136.5, C                   |                                       | 134.0, C                   |
| 5        |                                       | 40.5, C                    |                                       | 39.4, C                    |                                       | 42.6, C                    |
| 6        | 1.80, m                               | 33.7, CH <sub>2</sub>      | 1.50, m                               | 30.3, CH <sub>2</sub>      | 2.39, dt (15.0, 4.1)                  | 20.8, CH <sub>2</sub>      |
|          | 1.71, m                               |                            | 1.34, m                               |                            | 2.10, m                               |                            |
| 7        | 1.64, m                               | 29.2, CH <sub>2</sub>      | 1.95, m                               | 29.5, CH <sub>2</sub>      | 1.60, m                               | 28.4, CH <sub>2</sub>      |
|          | 1.42, m                               |                            | 1.70, m                               |                            | 1.31, m                               |                            |
| 8        | 1.31, m                               | 33.5, CH                   | 1.40, m                               | 33.7, CH                   | 1.66, m                               | 34.0, CH                   |
| 9        |                                       | 39.1, C                    |                                       | 40.8, C                    |                                       | 41.0, C                    |
| 10       | 2.28, brd, (12.9)                     | 42.0, CH                   | 2.38, d, (12.9)                       | 42.3, CH                   | 1.25, m                               | 41.8, CH                   |
| 11       | 1.35, m                               | 30.0, CH <sub>2</sub>      | 1.90, m                               | 33.9, CH <sub>2</sub>      | 1.58, m                               | 35.5, CH <sub>2</sub>      |
|          | 1.25, m                               |                            | 1.40, m                               |                            | 1.38, m                               |                            |
| 12       | 2.03, dt, (11.8, 5.6)                 | 35.1, CH <sub>2</sub>      | 2.01, m                               | 35.4, CH <sub>2</sub>      | 2.00, dd, (13.3, 7.8)                 | 35.2, CH <sub>2</sub>      |
|          | 1.97, m                               |                            |                                       |                            | 1.94, dd, (14.0, 7.0)                 |                            |
| 13       |                                       | 149.2, C                   |                                       | 149.1, C                   |                                       | 152.2, C                   |
| 14       | 5.45, t, (6.4)                        | 115.0, CH                  | 5.42, t, (6.8)                        | 114.8, CH                  | 5.50, m                               | 112.7, CH                  |
| 15       | 5.25, d, (6.5)                        | 48.6, CH <sub>2</sub>      | 5.11, d, (6.6)                        | 48.2, CH <sub>2</sub>      | 5.52, brs                             | 50.2, CH <sub>2</sub>      |
| 16       | 1.86, s                               | 17.2, CH <sub>3</sub>      | 1.80, s                               | 16.7, CH <sub>3</sub>      | 1.84, s                               | 17.1, CH <sub>3</sub>      |
| 17       | 1.07, d, (7.4)                        | 18.7, CH <sub>3</sub>      | 1.10, d, (7.4)                        | 18.9, CH <sub>3</sub>      | 1.10, d, (7.3)                        | 17.5, CH <sub>3</sub>      |
| 18       | 1.62, s                               | 21.7, CH <sub>3</sub>      | 1.67, s                               | 22.0, CH <sub>3</sub>      | 1.62, s                               | 19.9, CH <sub>3</sub>      |
| 19       | 0.86, s                               | 17.2, CH <sub>3</sub>      | 1.01, s                               | 15.9, CH <sub>3</sub>      | 1.15, s                               | 24.3, CH <sub>3</sub>      |
| 20       | 0.94, s                               | 15.6, CH <sub>3</sub>      | 0.90, s                               | 18.6, CH <sub>3</sub>      | 0.87, s                               | 18.3, CH <sub>3</sub>      |
| 2'       | 8.54, s                               | 155.8, CH                  | 8.31, s                               | 155.5, CH                  | 8.71, s                               | 149.0, CH                  |
| 4'       |                                       | 149.7, C                   |                                       | 149.4, C                   |                                       | 143.5, C                   |
| 5'       |                                       | 110.0, C                   |                                       | 110.0, C                   |                                       | 119.7, C                   |
| 6'       |                                       | 151.8, C                   |                                       | 152.2, C                   |                                       | 148.7, C                   |
| 8'       | 9.87, s                               | 142.2, C                   | 9.30, s                               | 141.0, CH                  | 9.90, s                               | 143.3, C                   |
| 9'-N-Me  | 4.06, s                               | 31.9, CH <sub>3</sub>      | 3.30, s                               | 31.0, CH <sub>3</sub>      | 4.11, s                               | 34.0, CH <sub>3</sub>      |

<sup>a</sup>In CDCl<sub>3</sub>. <sup>b</sup>In C<sub>6</sub>D<sub>6</sub>. <sup>c</sup>In CDCl<sub>3</sub> (after 24 h)

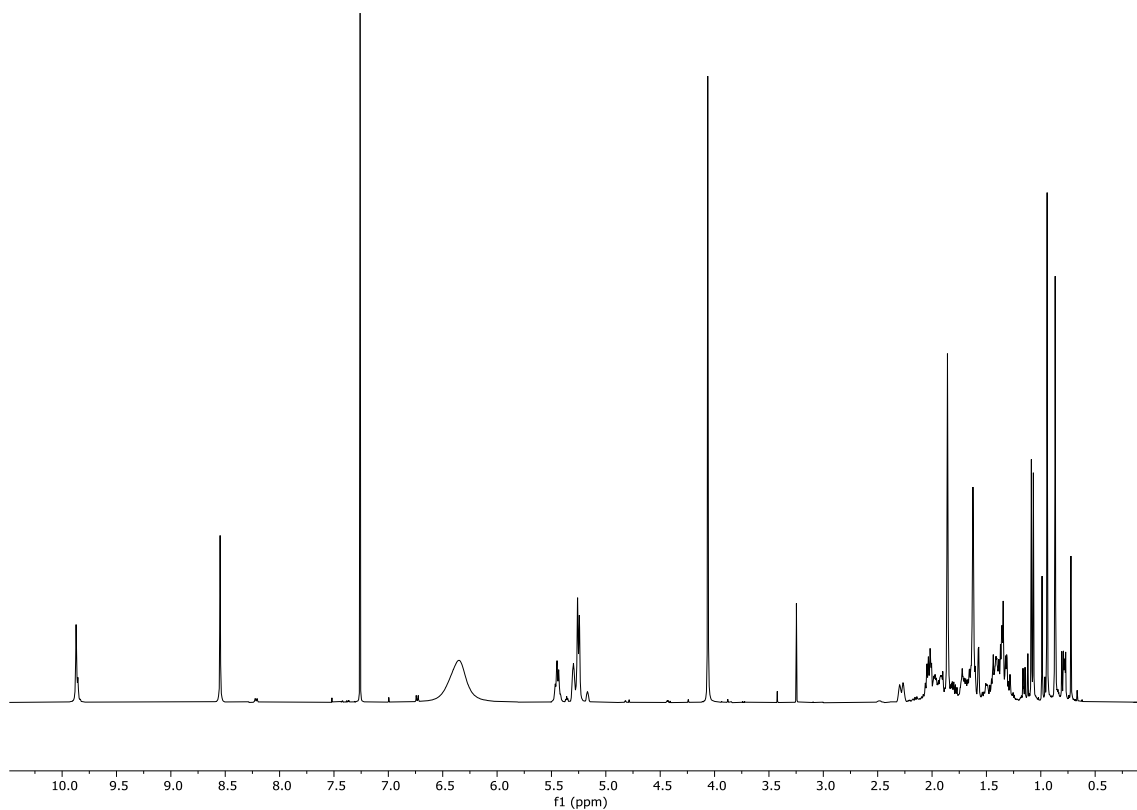

**Figure S10.**  $^1\text{H}$  NMR spectrum (500 MHz,  $\text{CDCl}_3$ ) of 10-epiagelasine B (**2**).

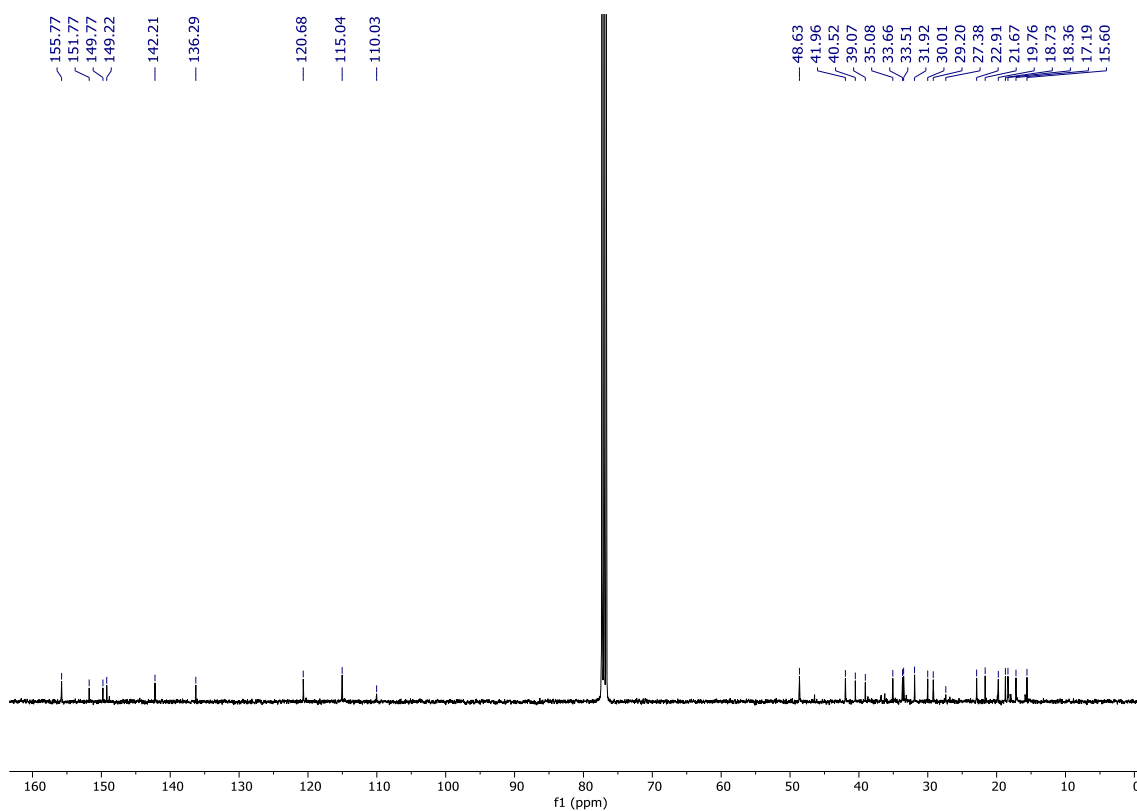

**Figure S11.**  $^{13}\text{C}$  NMR spectrum (125 MHz,  $\text{CDCl}_3$ ) of 10-epiagelasine B (**2**).

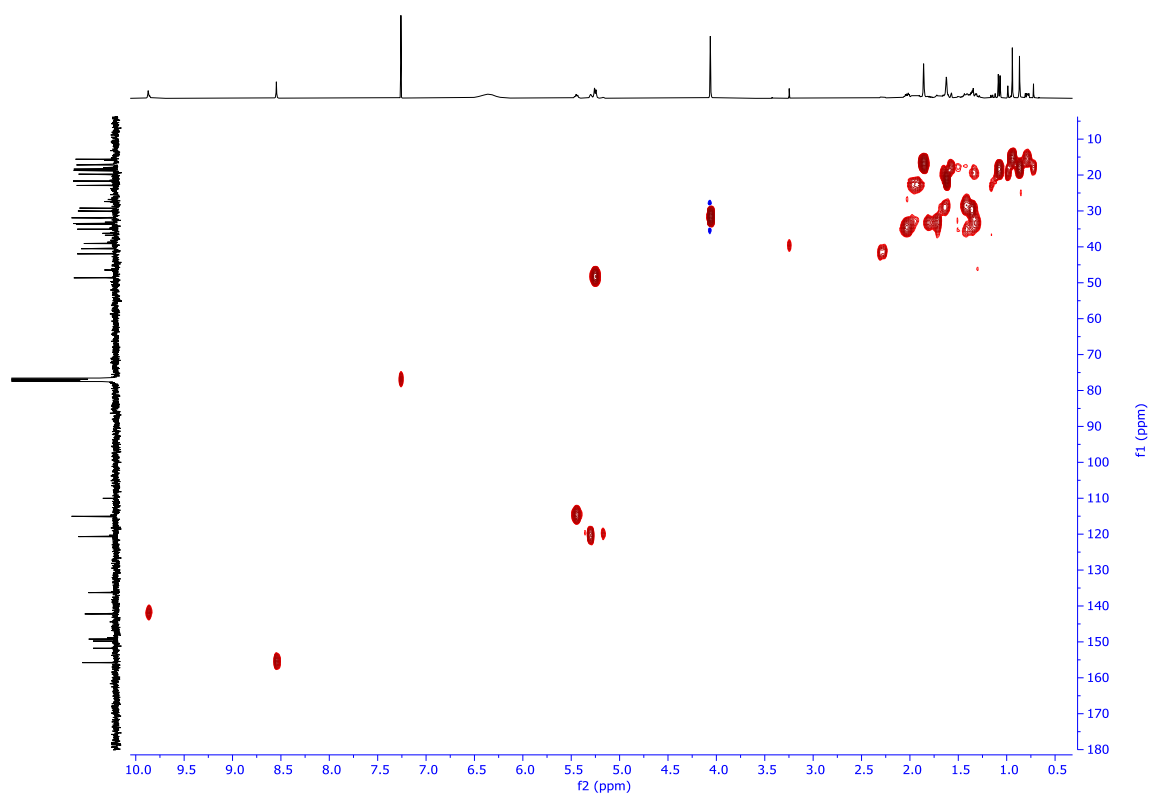

**Figure S12.** HSQC spectrum (500 MHz,  $\text{CDCl}_3$ ) of 10-epiagelastine B (2).

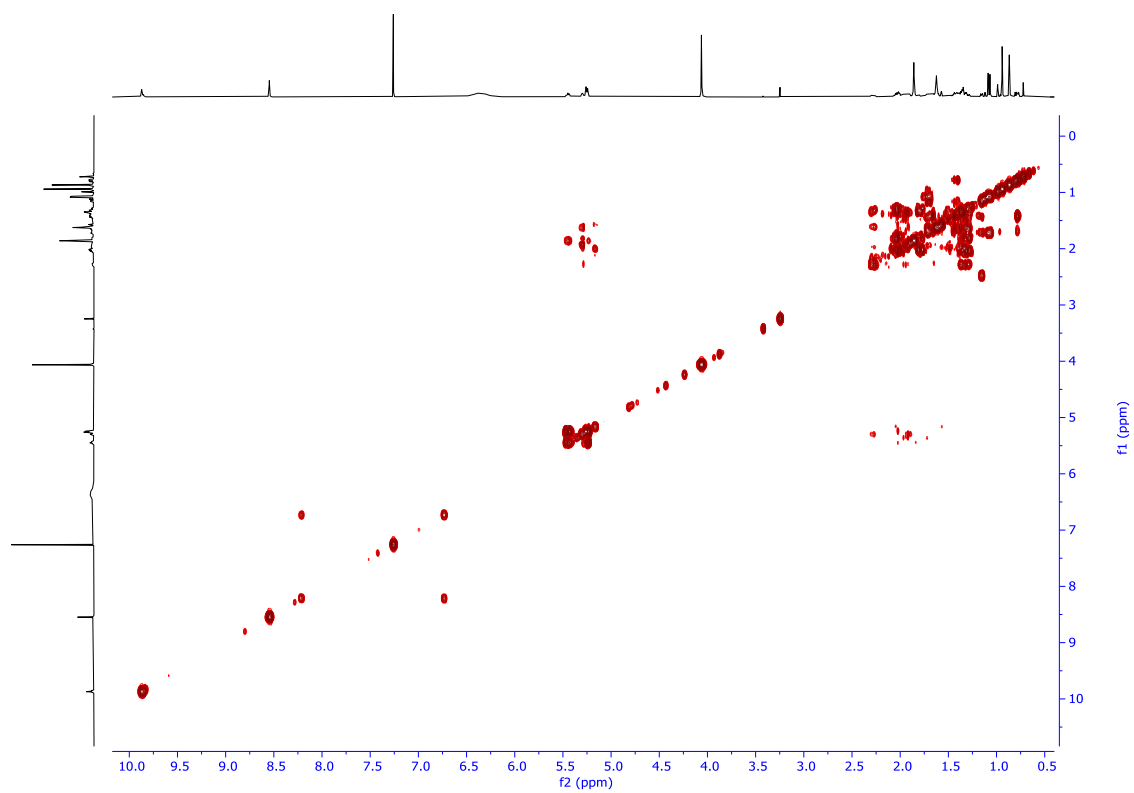

**Figure S13.**  $^1\text{H}$ - $^1\text{H}$  COSY spectrum (500 MHz,  $\text{CDCl}_3$ ) of 10-epiagelastine B (2).

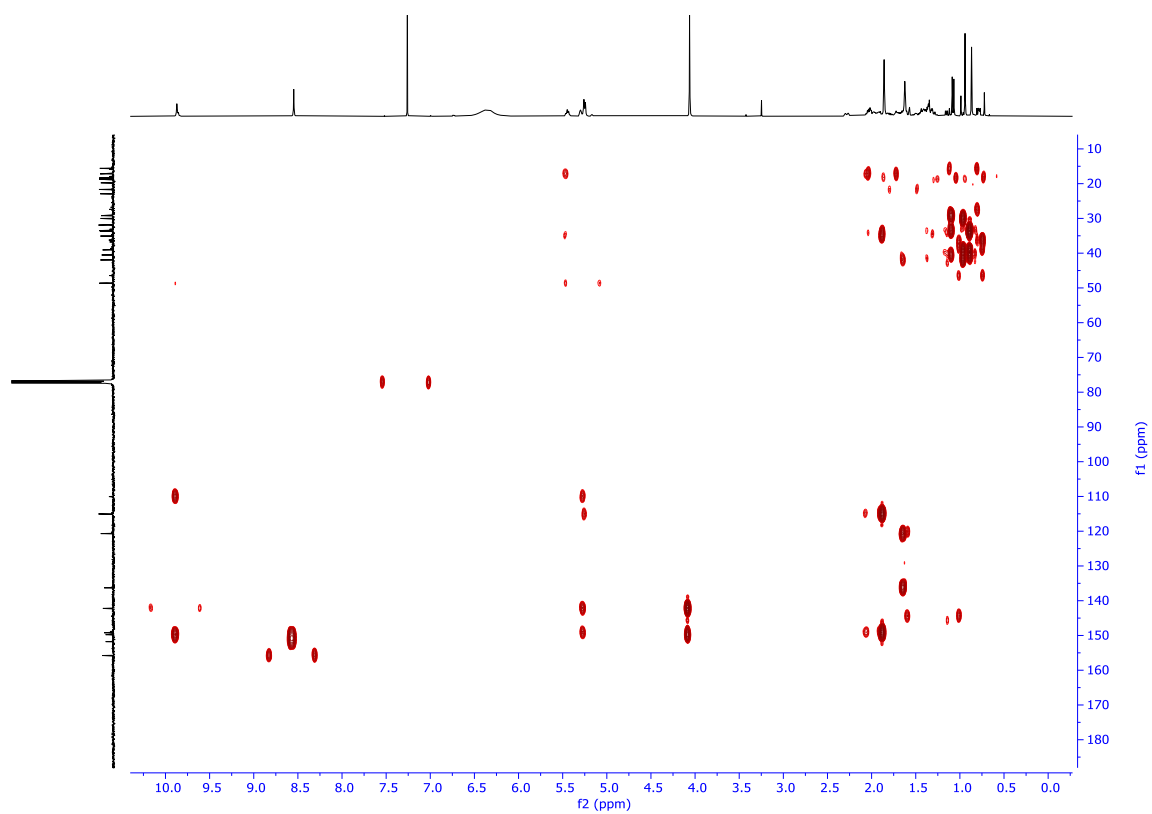

**Figure S14.** HMBC spectrum (500 MHz, CDCl<sub>3</sub>) of 10-epiagelasine B (2).

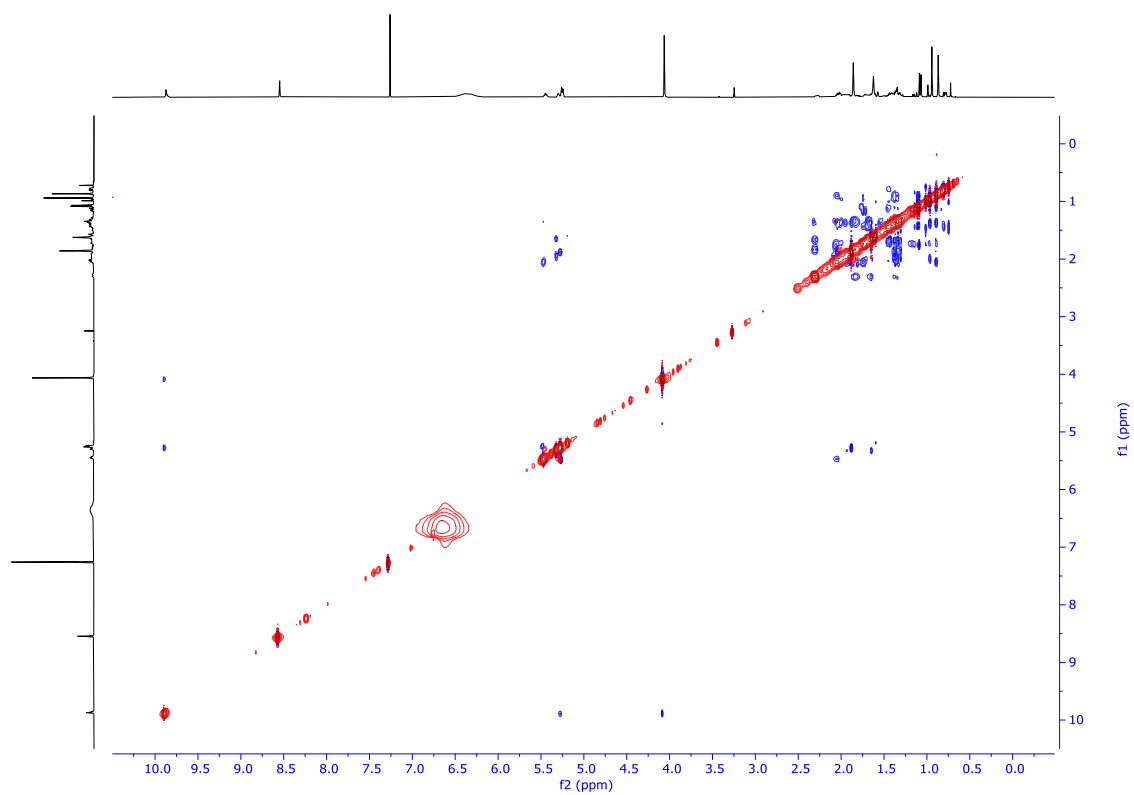

**Figure S15.** NOESY spectrum (500 MHz, CDCl<sub>3</sub>) of 10-epiagelasine B (2).

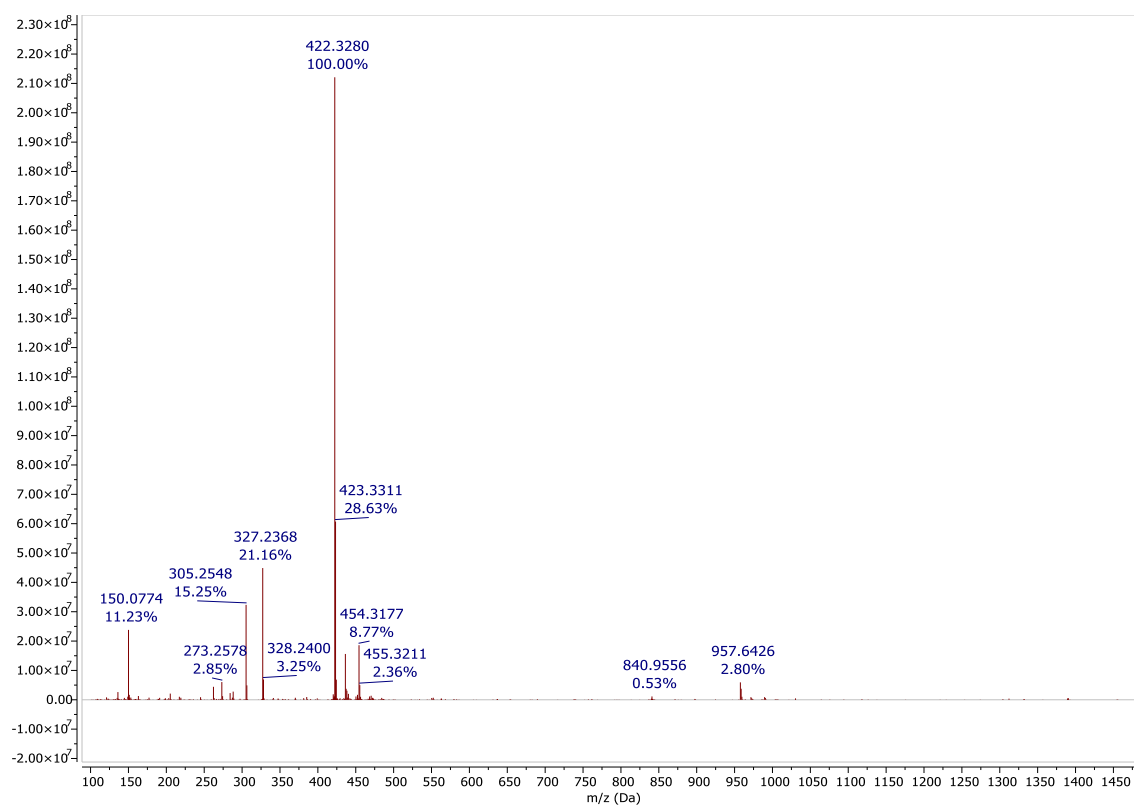

**Figure S16.** (+)-HR-ESIMS of 10-epiagelastine B (**2**).

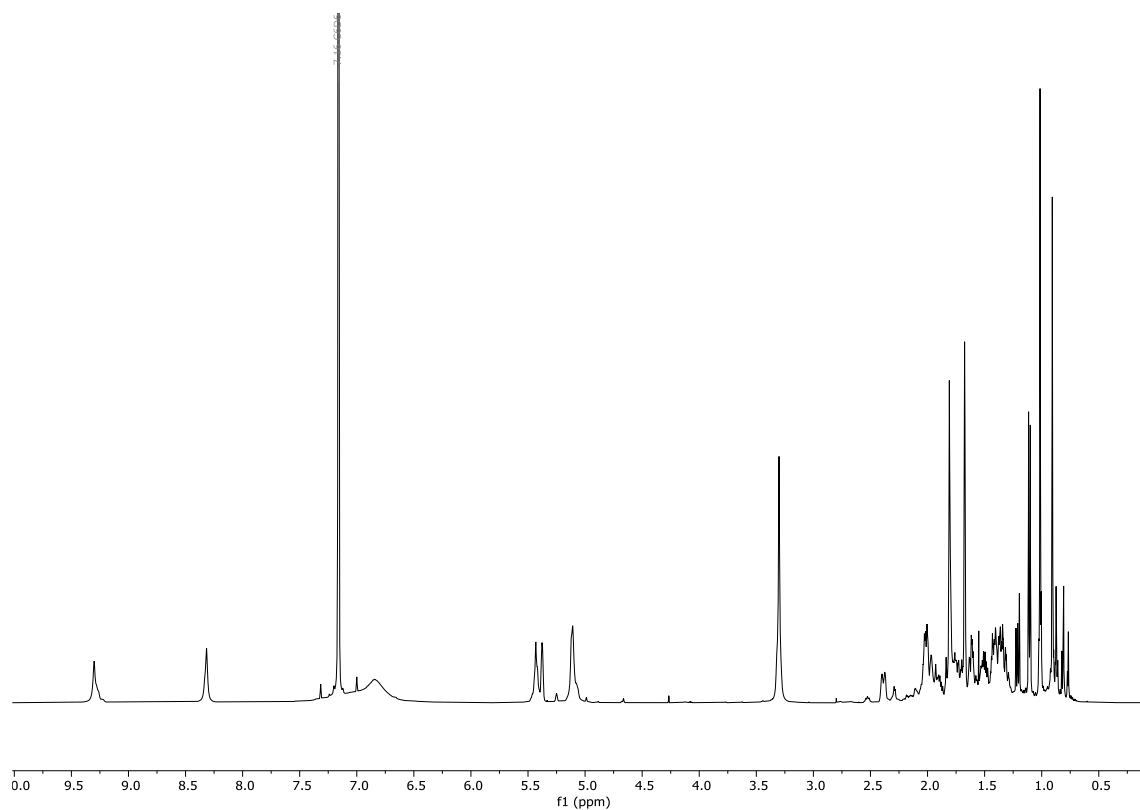

**Figure S17.**  $^1\text{H}$  NMR spectrum (500 MHz,  $\text{C}_6\text{D}_6$ ) of 10-epiagelastine B (**2**).

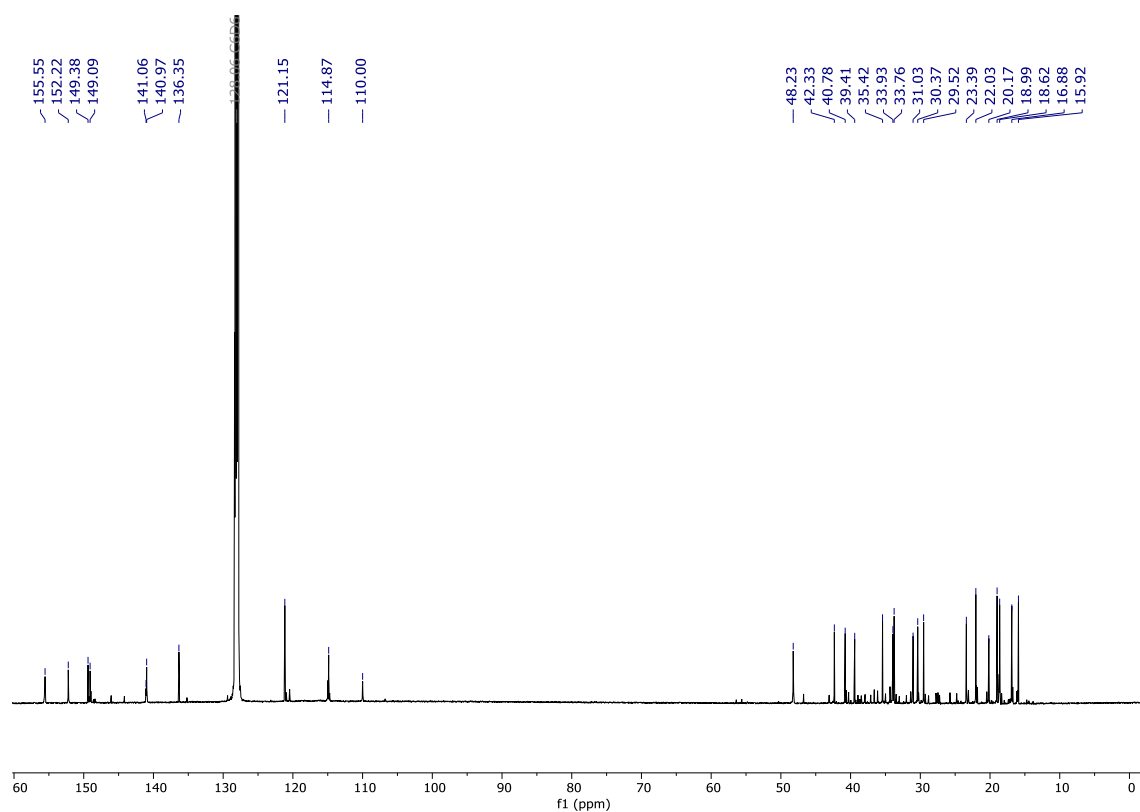

**Figure S18.**  $^{13}\text{C}$  NMR spectrum (125 MHz,  $\text{C}_6\text{D}_6$ ) of 10-epiagelastine B (**2**).

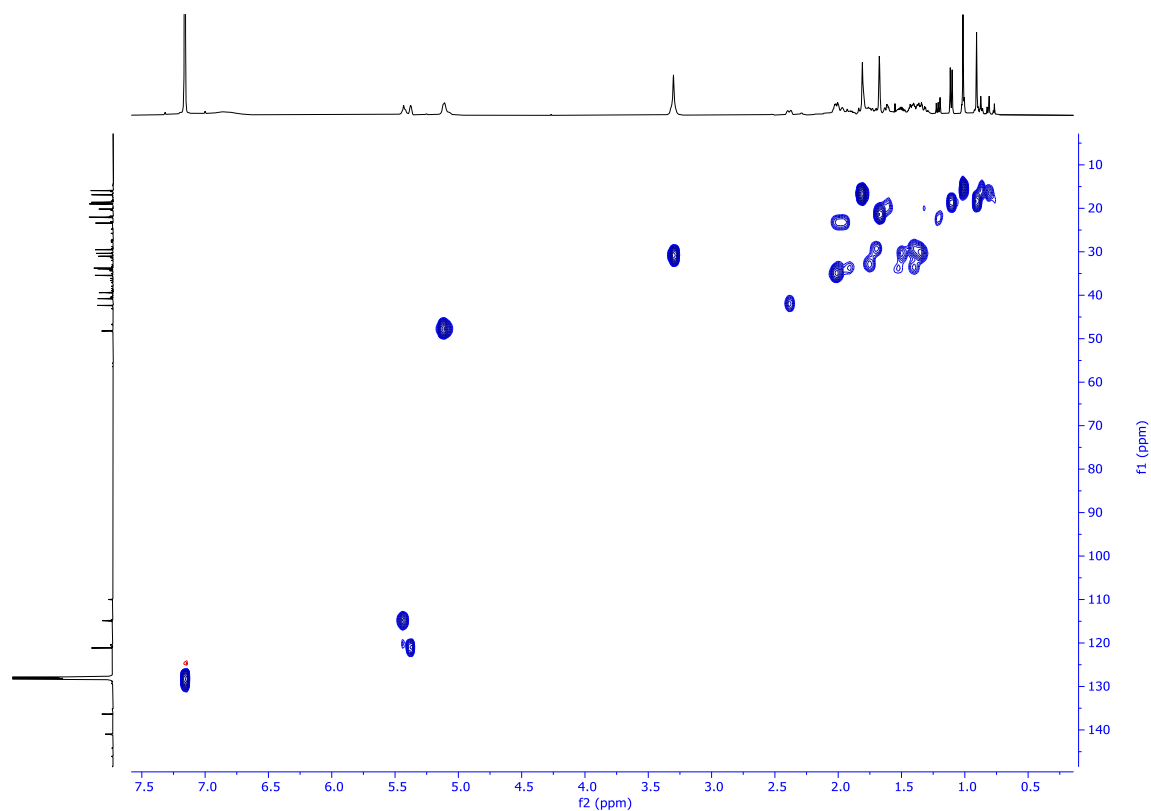

**Figure S19.** HSQC NMR spectrum (500 MHz,  $\text{C}_6\text{D}_6$ ) of 10-epiagelastine B (**2**).

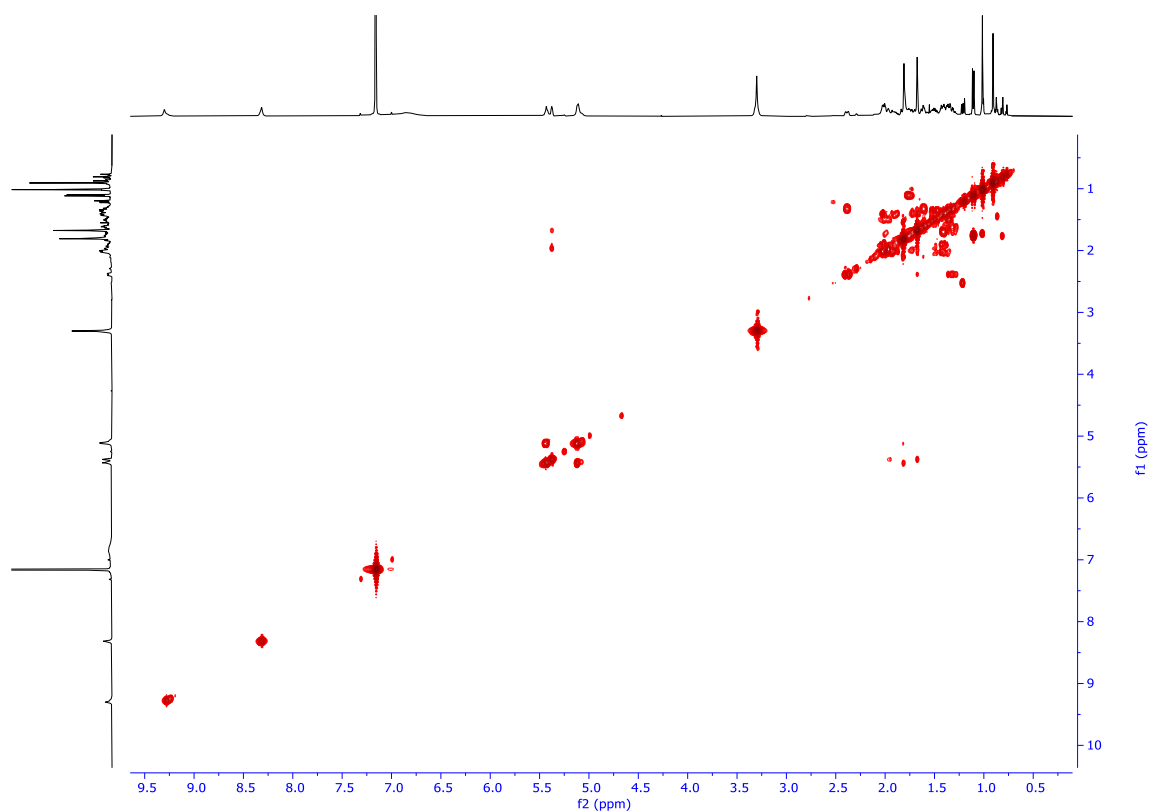

**Figure S20.**  $^1\text{H}$ - $^1\text{H}$  COSY NMR spectrum (500 MHz,  $\text{C}_6\text{D}_6$ ) of 10-epiagelasine B (**2**).

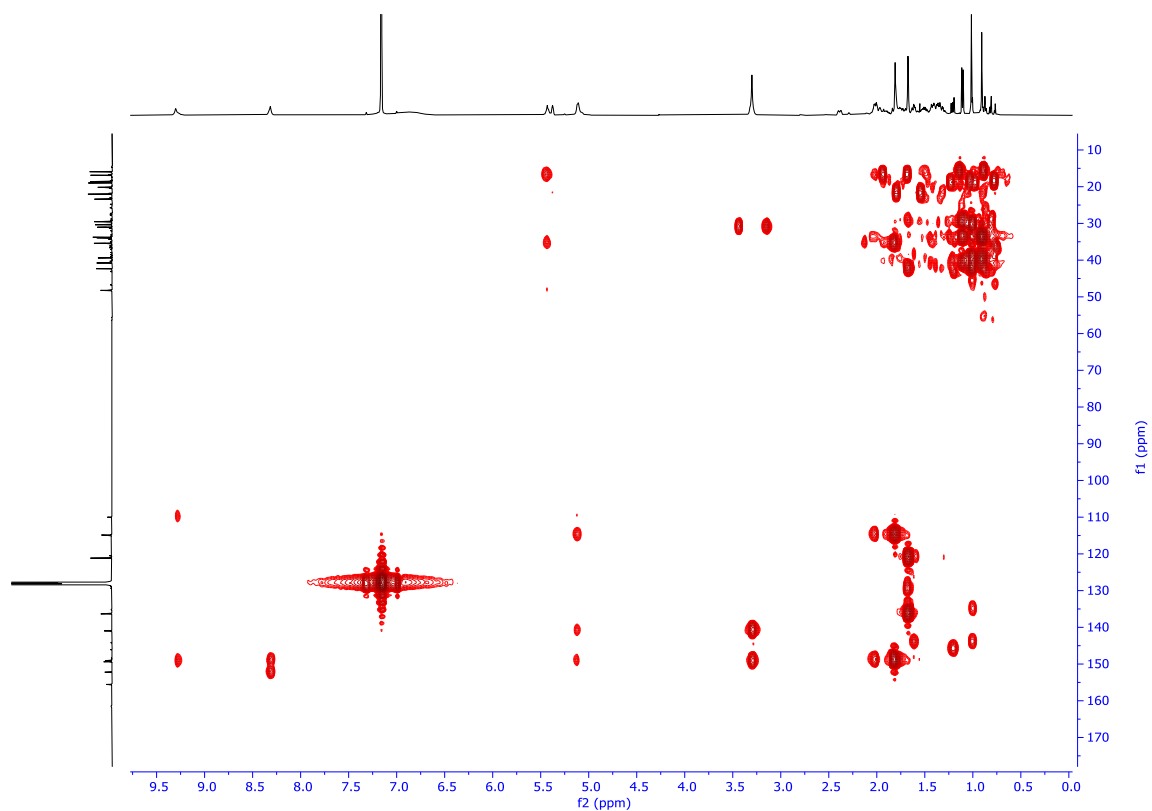

**Figure S21.** HMBC NMR spectrum (500 MHz,  $\text{C}_6\text{D}_6$ ) of 10-epiagelasine B (**2**).



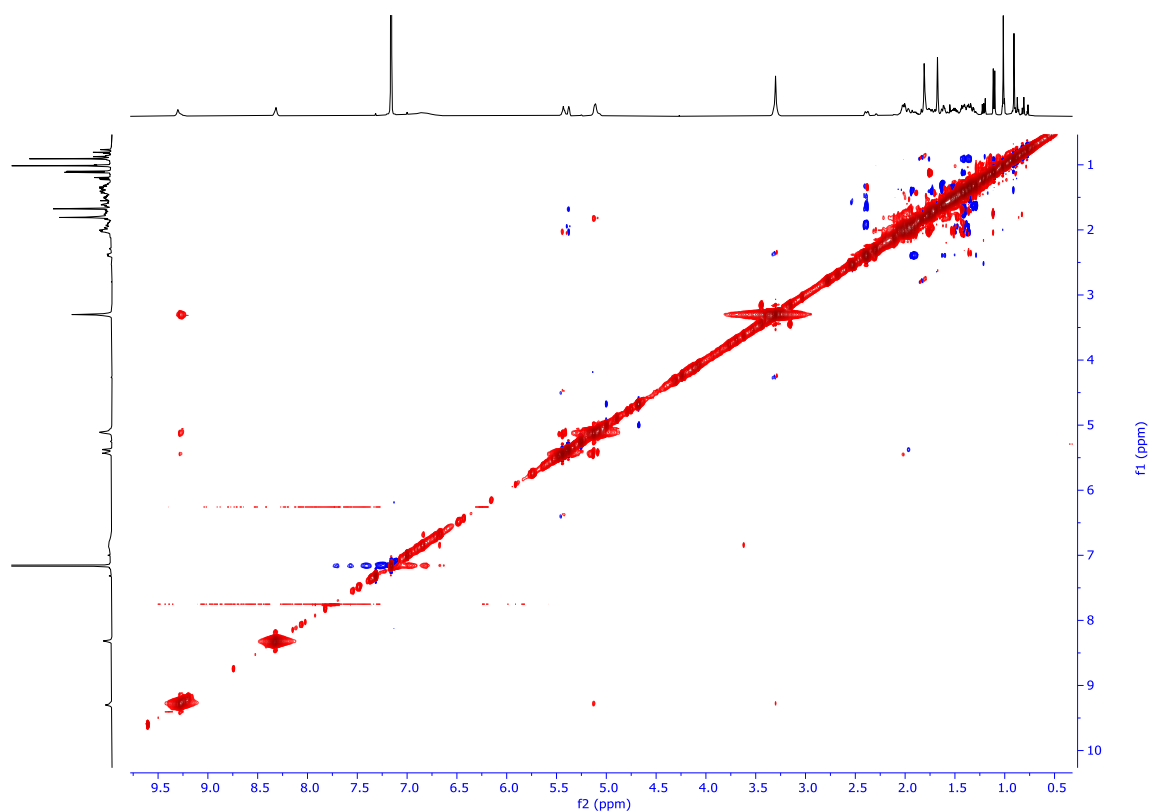

**Figure S22.** NOESY NMR spectrum (500 MHz, C<sub>6</sub>D<sub>6</sub>) of 10-epiagelastine B (**2**).

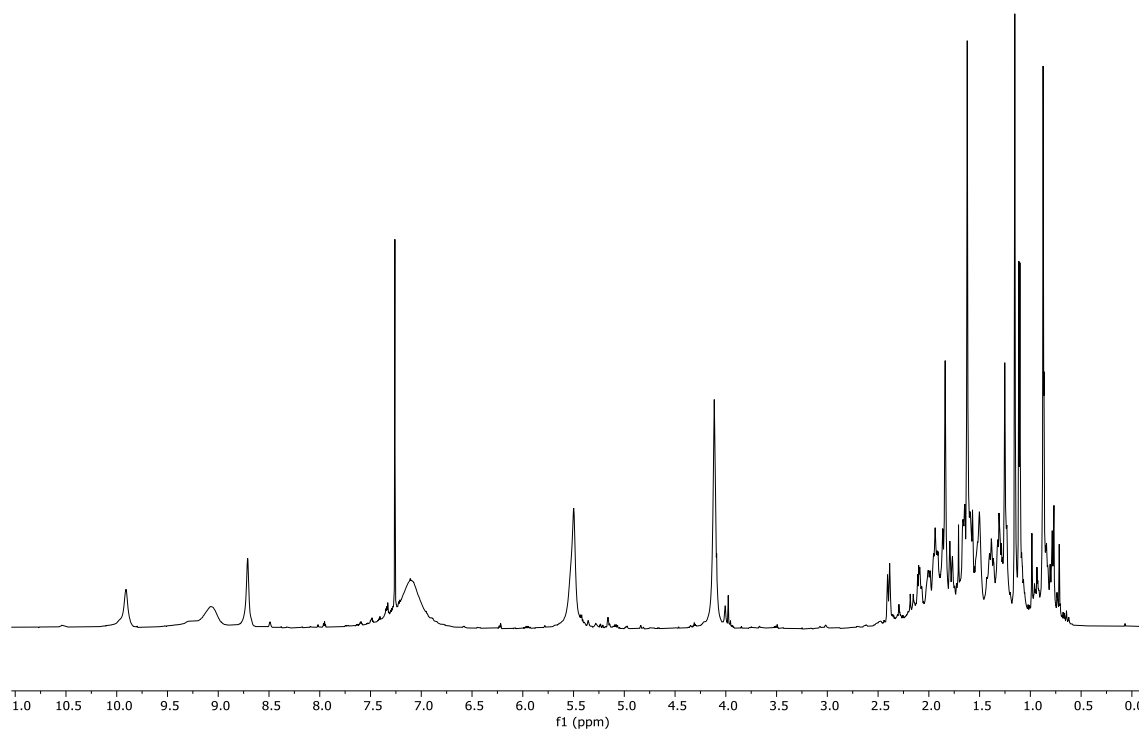

**Figure S23.** <sup>1</sup>H NMR spectrum (800 MHz, CDCl<sub>3</sub>, after 24 h) of 10-epiagelastine B (**2**).

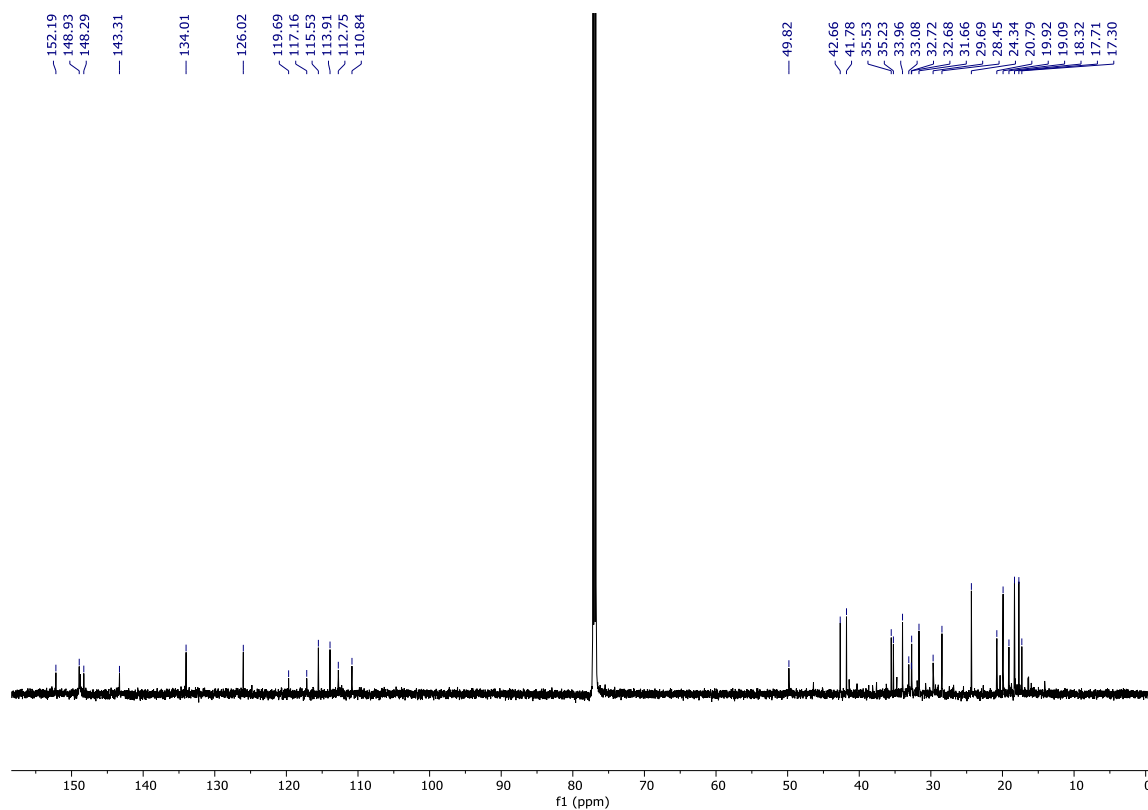

**Figure S24.**  $^{13}\text{C}$  NMR spectrum (200 MHz,  $\text{CDCl}_3$ , after 24 h) of 10-epiagelasine B (**2**).

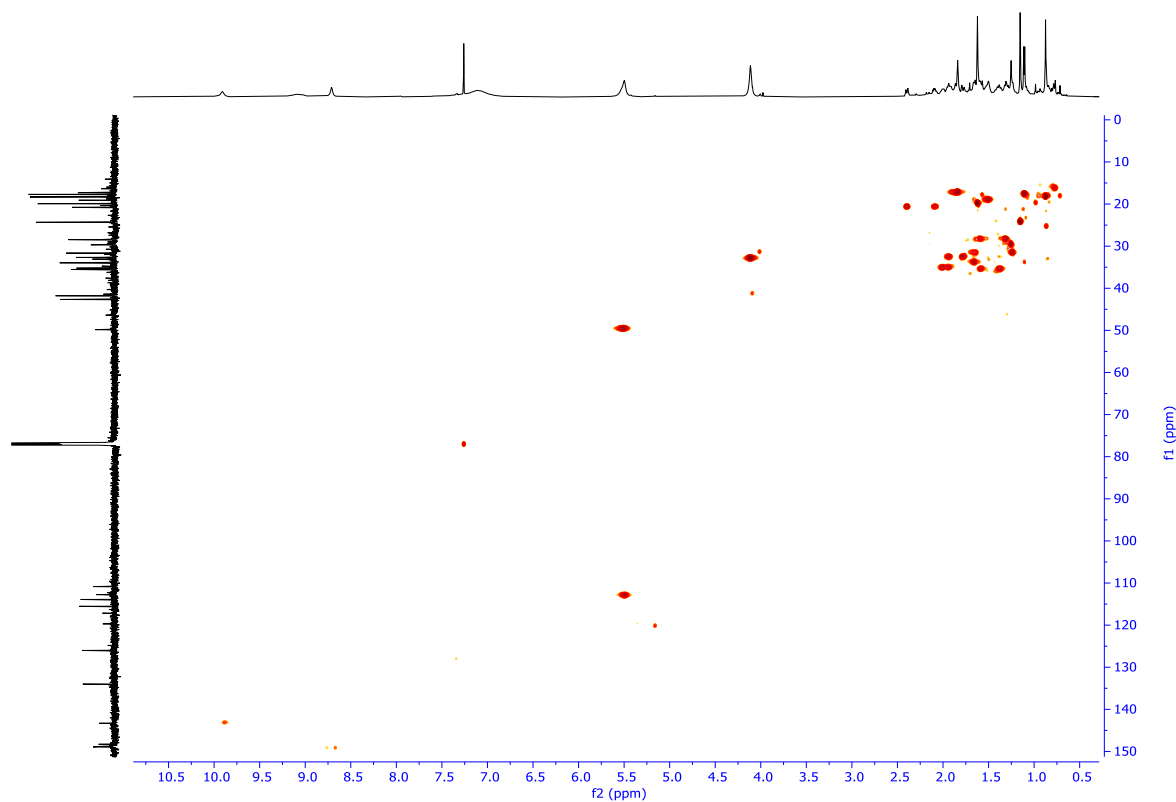

**Figure S25.** HSQC spectrum (800 MHz,  $\text{CDCl}_3$ , after 24 h) of 10-epiagelasine B (**2**). NUS parameters: 20%/384/38.

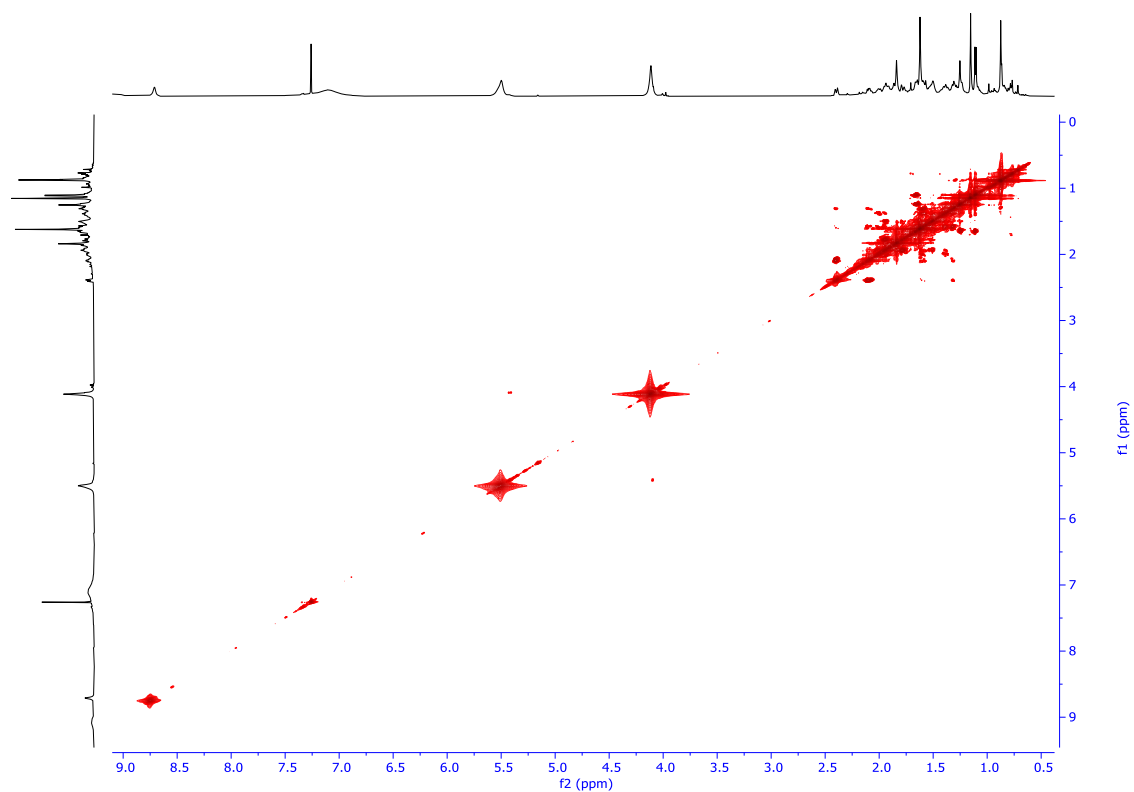

**Figure S26.**  $^1\text{H}$ - $^1\text{H}$  COSY spectrum (800 MHz,  $\text{CDCl}_3$ , after 24 h) of 10-epiagelasine B (**2**). NUS parameters: 50%/384/192.

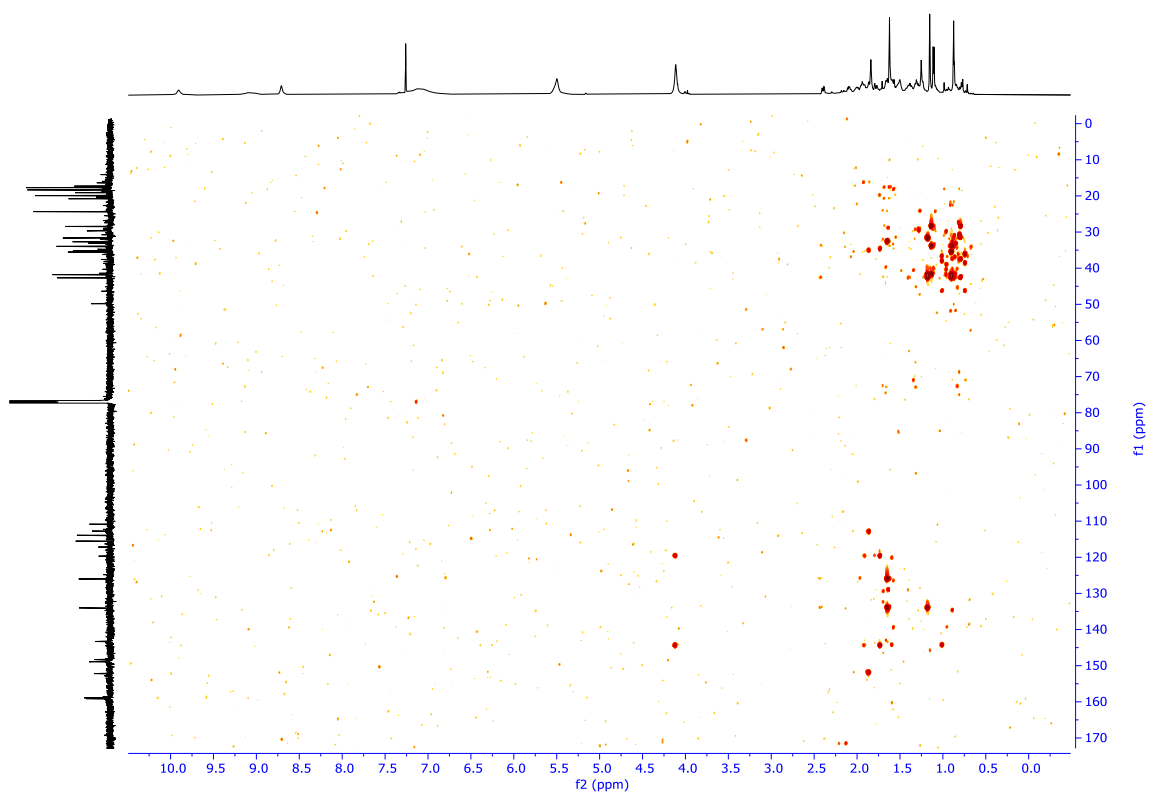

**Figure S27.** HMBC spectrum (800 MHz,  $\text{CDCl}_3$ , after 24 h) of 10-epiagelasine B (**2**). NUS parameters: 25%/512/64.

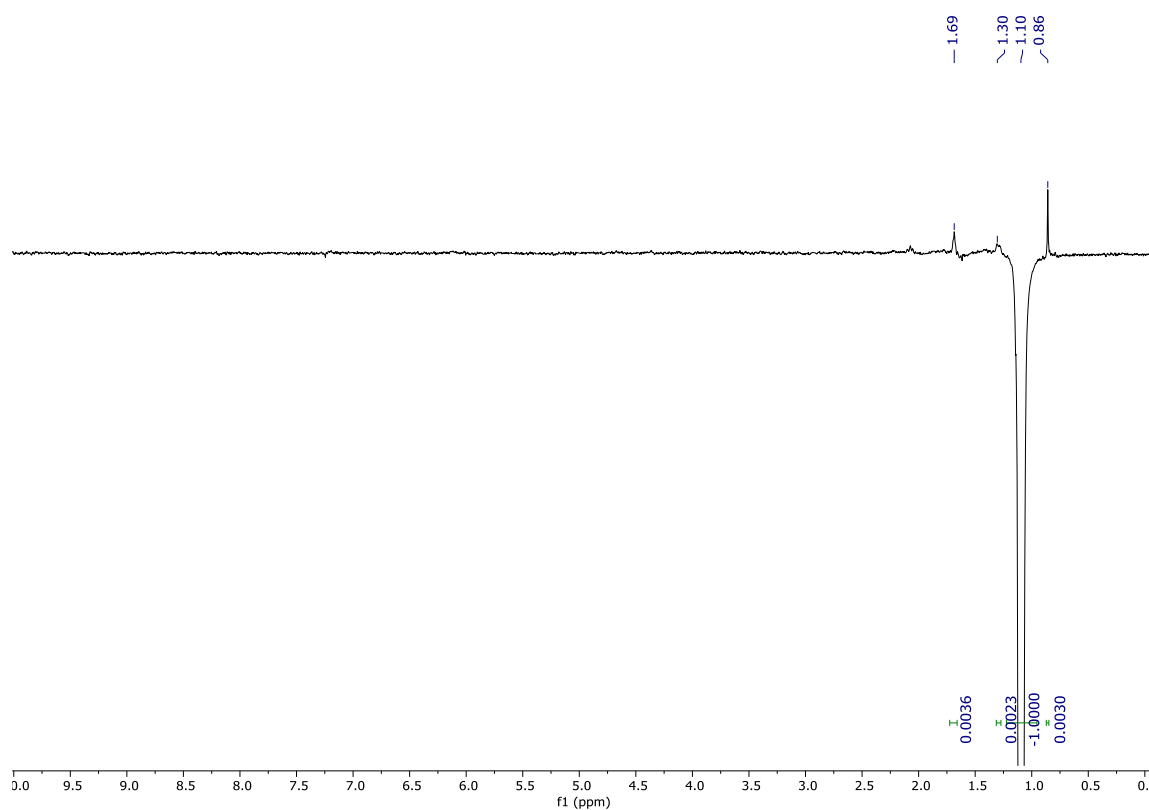

**Figure S28.** 1D-NOESY spectrum irradiating on CH<sub>3</sub>-17 ( $\delta_{\text{H}}$  1.10) of 10-epiagelasine B (**2**) (800 MHz, CDCl<sub>3</sub>, after 24 h).

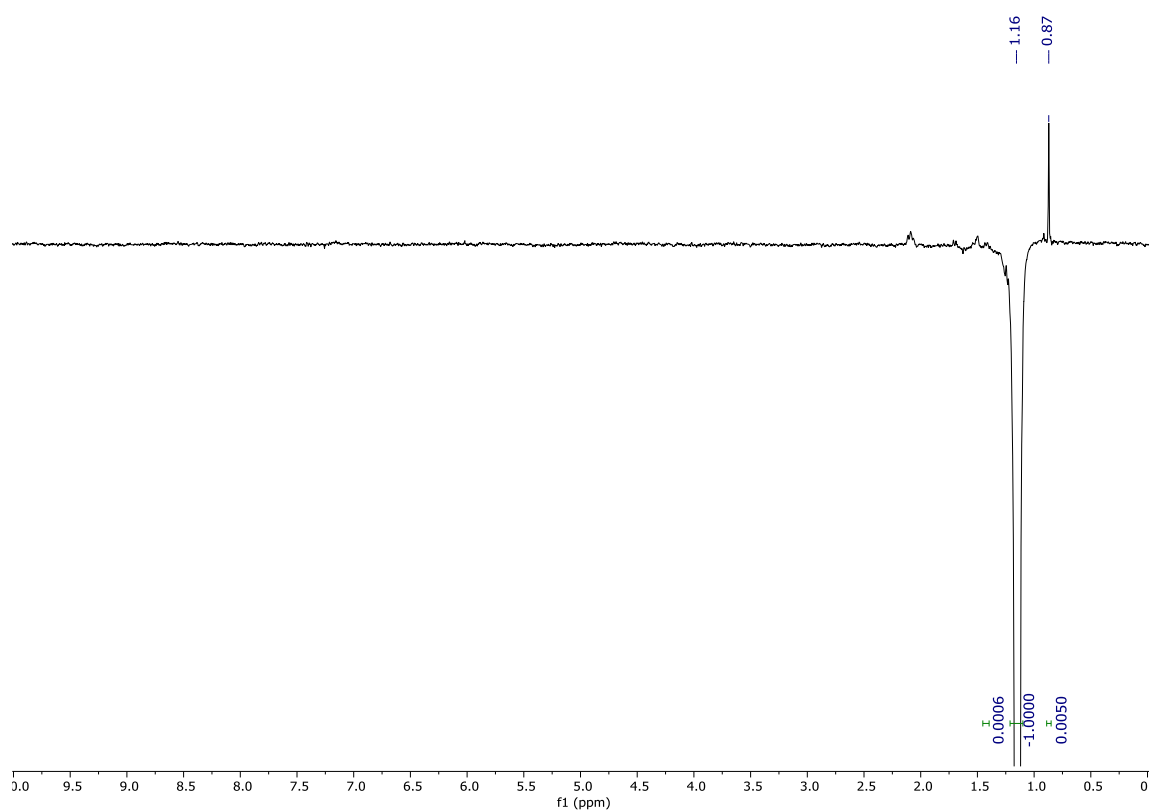

**Figure S29.** 1D-NOESY spectrum irradiating on CH<sub>3</sub>-19 ( $\delta_{\text{H}}$  1.15) of 10-epiagelasine B (**2**) (800 MHz, CDCl<sub>3</sub>, after 24 h).

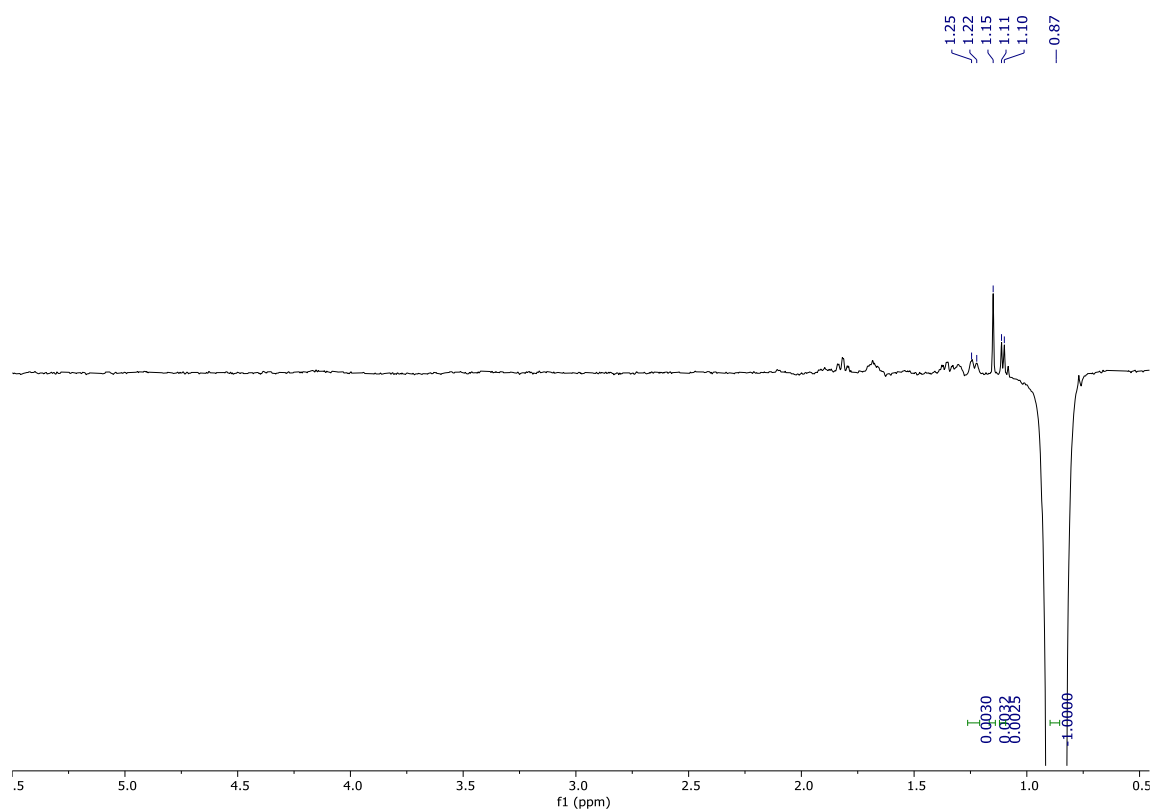

**Figure S30.** 1D-NOESY spectrum irradiating on CH<sub>3</sub>-20 ( $\delta_{\text{H}}$  0.87) of 10-epiagelasine B (**2**) (800 MHz, CDCl<sub>3</sub>, after 24 h).

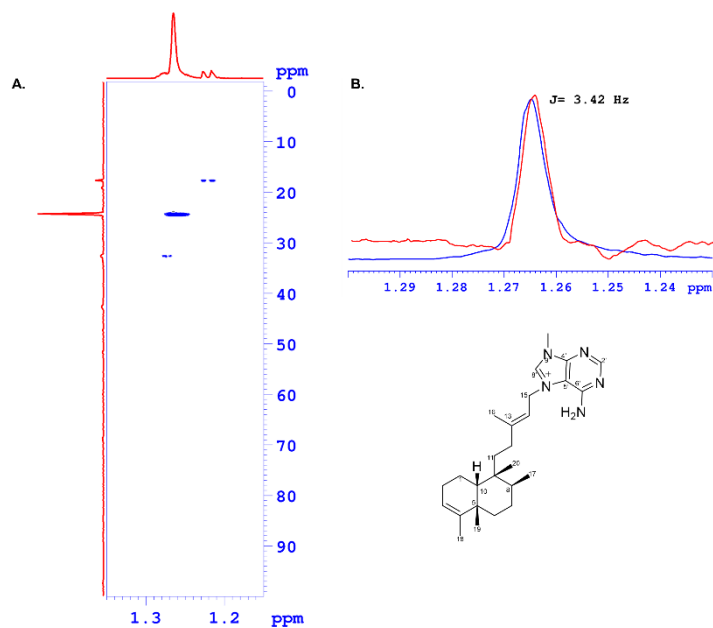

**Figure S31.** 2D IPAP-HSQMBC spectrum (optimized to 6 Hz) after selective inversion of H-10 proton of 10-epi-agelastine B (A). Slice from C-19 to H-10 (B). Measurement of  $^2,3J_{CH}$  values were performed by analysis of IPAP multiplet patterns. NUS parameters: 12%/512/30.

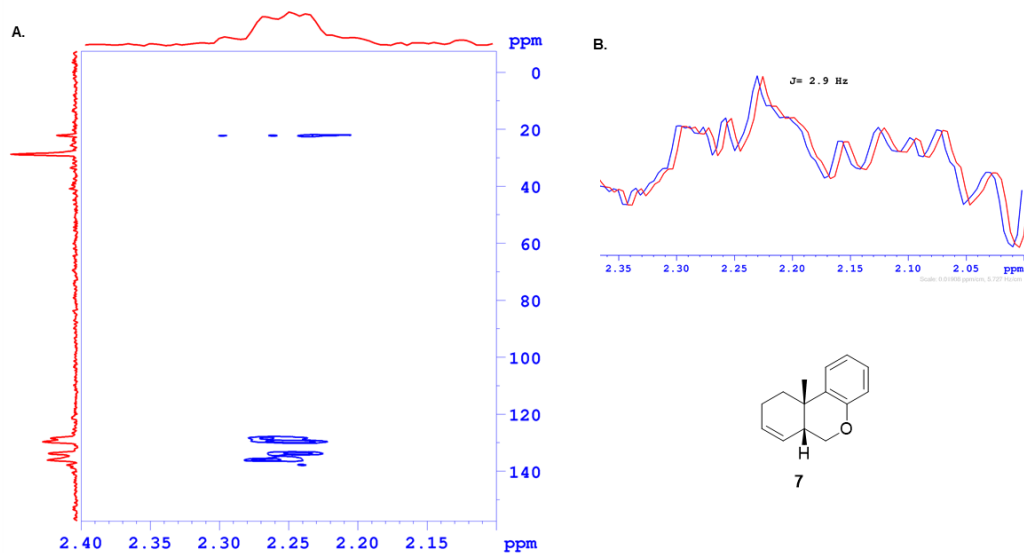

**Figure S32.** 2D IPAP-HSQMBC spectrum (optimized to 6 Hz) after selective inversion of H-5 proton of **7**. Slice from C-7 to H-5 (B). Measurement of  $^2,3J_{CH}$  values were performed by analysis of IPAP multiplet patterns. NUS parameters: 12%/512/30.

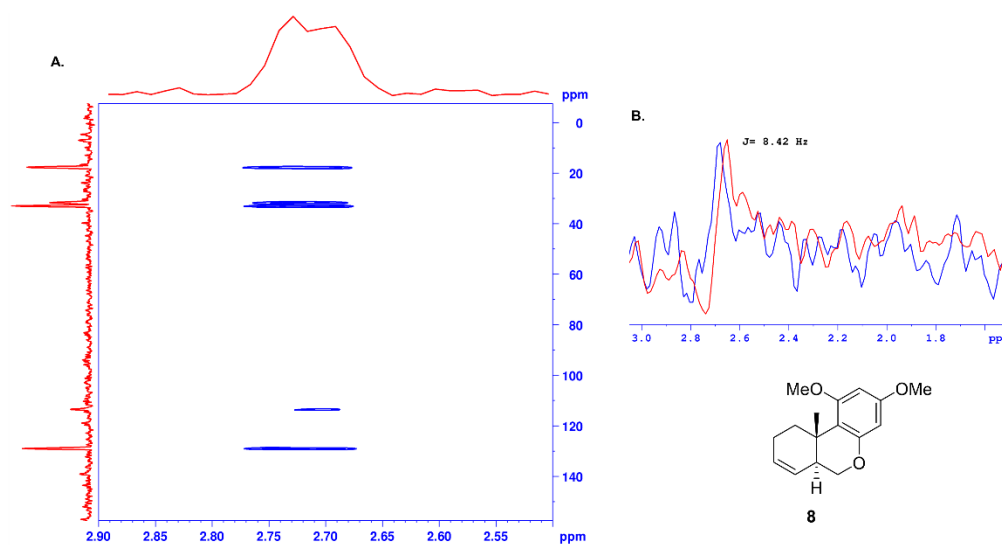

**Figure S33.** 2D IPAP-HSQMBC spectrum (optimized to 6 Hz) after selective inversion of H-5 proton of **8**. Slice from C-7 to H-5 (B). Measurement of  $^2,3J_{\text{CH}}$  values were performed by analysis of IPAP multiplet patterns. NUS parameters: 12%/512/30.

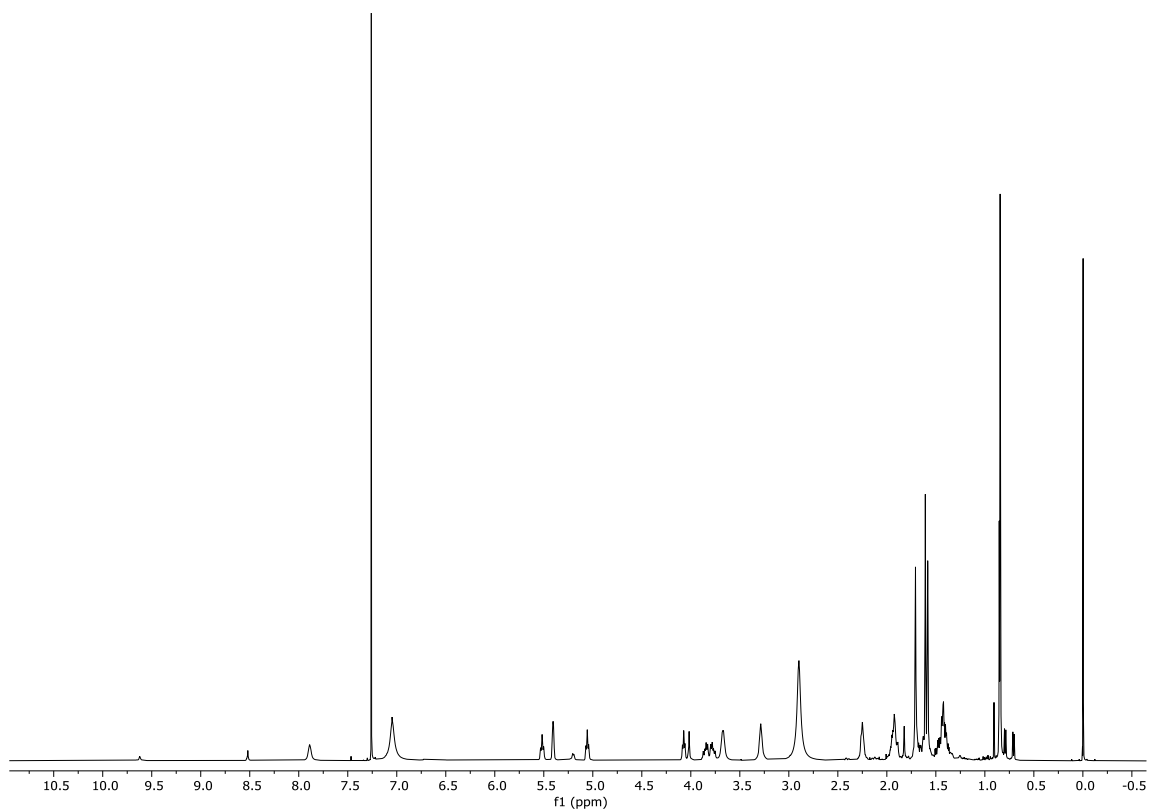

**Figure S34.**  $^1\text{H}$  NMR spectrum (500 MHz,  $\text{CDCl}_3$ ) of 12-hydroxyagelasidine C (**3**).

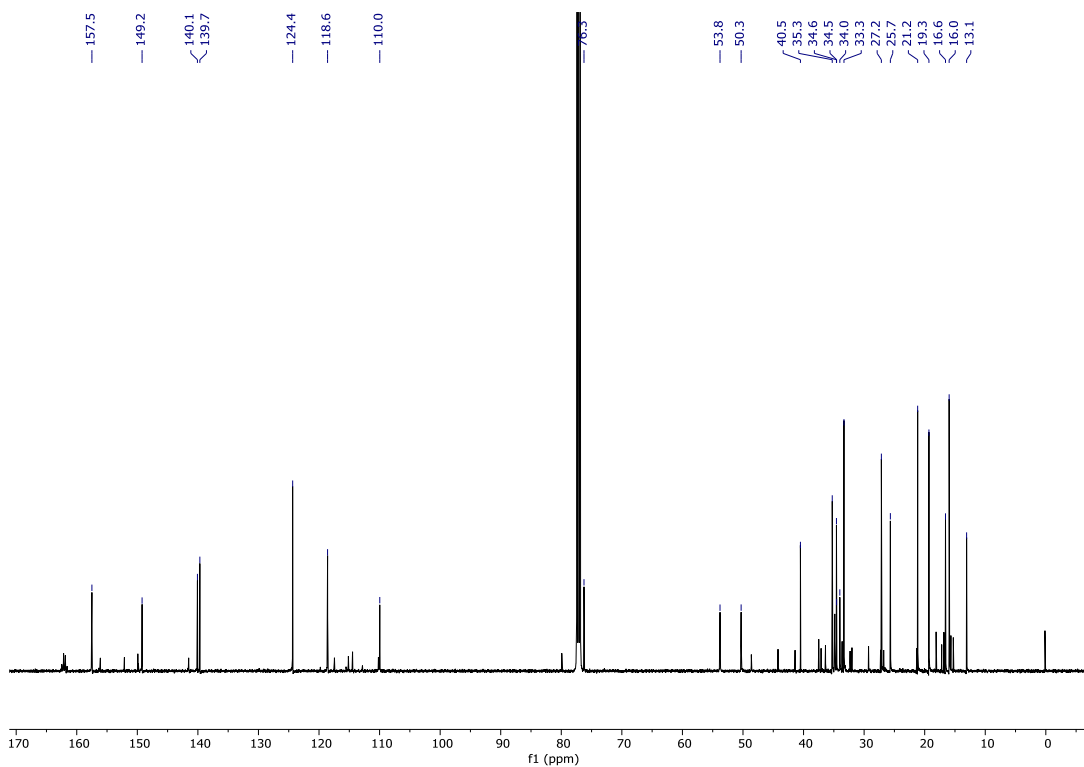

**Figure S35.**  $^{13}\text{C}$  NMR spectrum (125 MHz,  $\text{CDCl}_3$ ) of 12-hydroxyagelasidine C (**3**).



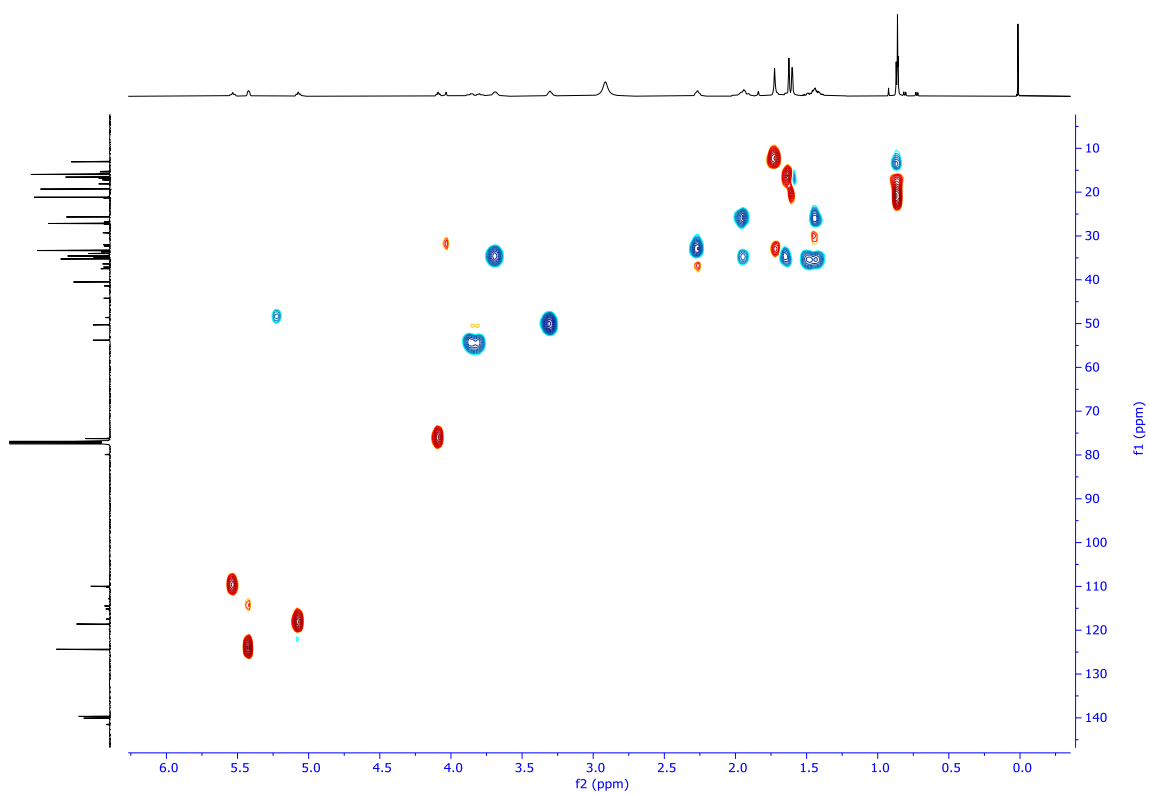

**Figure S36.** HSQC spectrum (500 MHz,  $\text{CDCl}_3$ ) of 12-hydroxyagelasidine C (**3**).

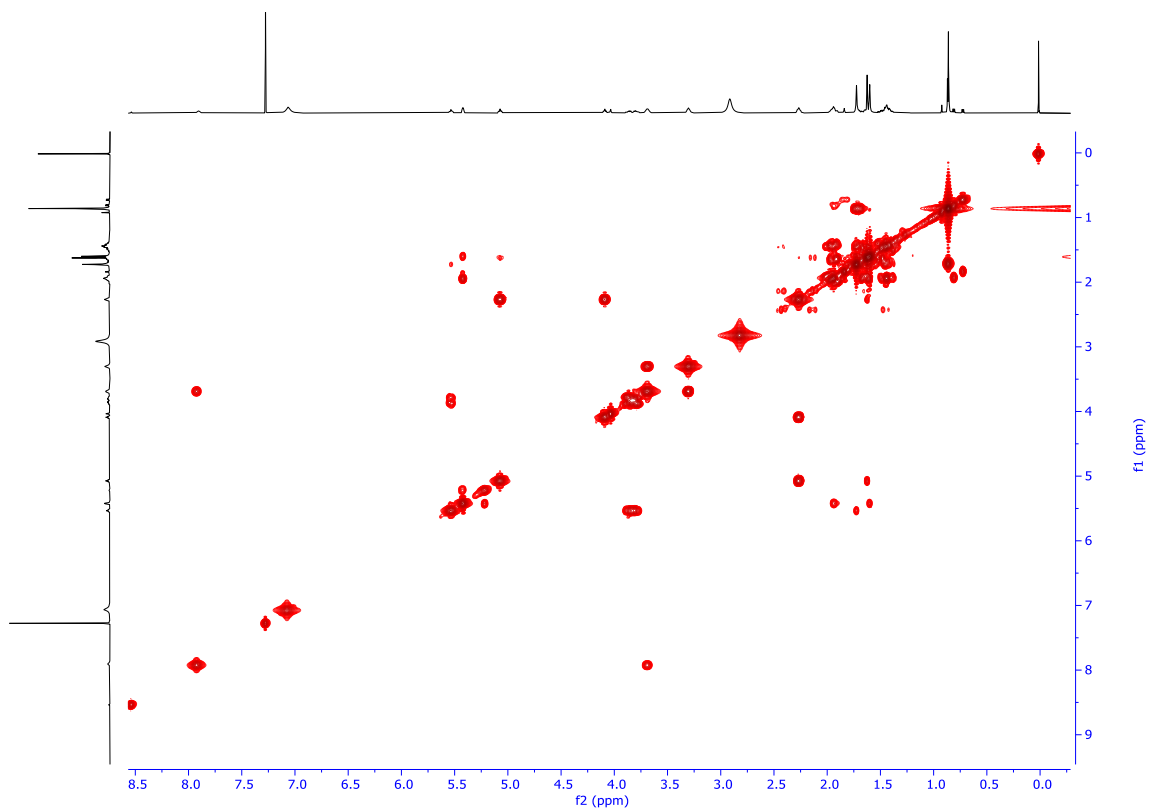

**Figure S37.**  $^1\text{H}$ - $^1\text{H}$  COSY spectrum (500 MHz,  $\text{CDCl}_3$ ) of 12-hydroxyagelasidine C (**3**).

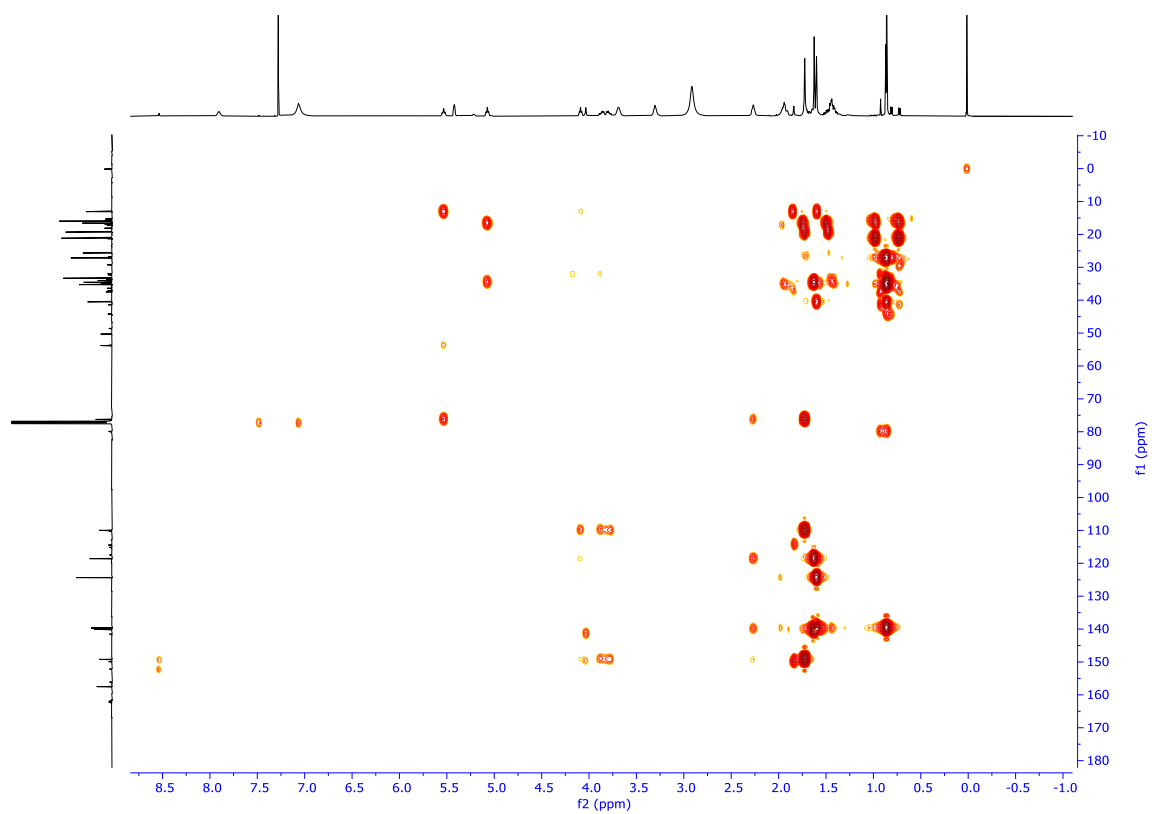

**Figure S38.** HMBC spectrum (500 MHz, CDCl<sub>3</sub>) of 12-hydroxyagelasidine C (**3**).

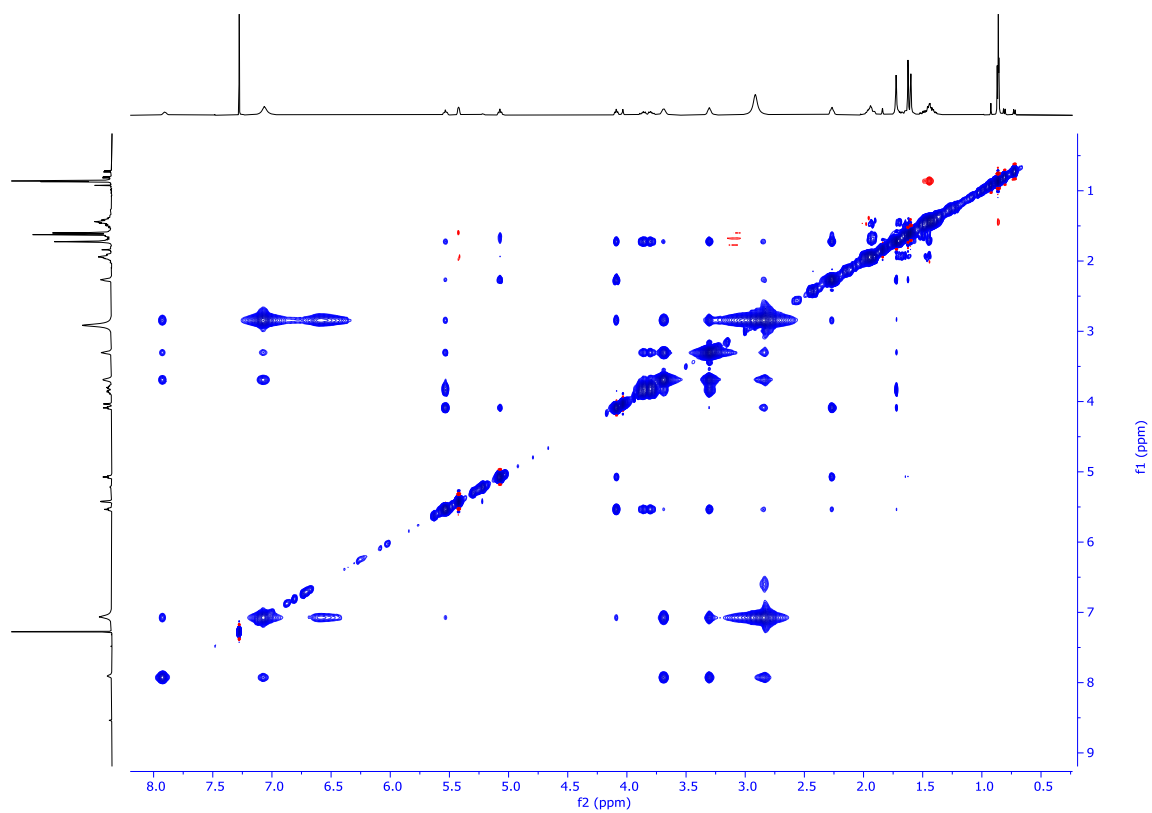

**Figure S39.** NOESY spectrum (500 MHz, CDCl<sub>3</sub>) of 12-hydroxyagelasidine C (**3**).

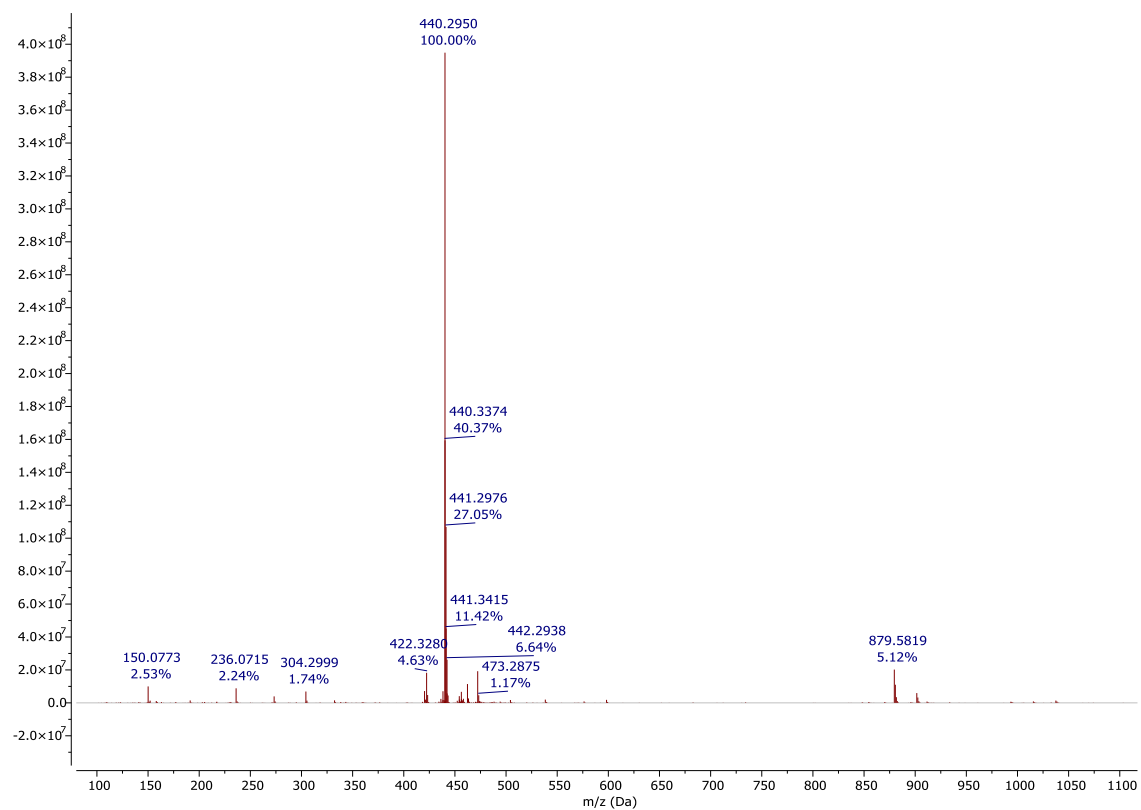

**Figure S40.** (+)-HR-ESIMS of 12-hydroxyagelasidine C (**3**).
